# Supplementary material for: 20-electron exohedral alkaline-earth metallofullerenes M(C60)3 (M = Ca, Sr, and Ba)
Source: Royal Society of Chemistry journal article supplement (doi:10.1039/d4cp03404j), 2024-01-01
Supplement: d4cp03404j1.pdf [file d4cp03404j1.pdf]

*Electronic Supplementary Information (ESI) for*

**20-electron exohedral alkaline-earth-metallofullerenes  $M(C_{60})_3$  ( $M = Ca, Sr, Ba$ )**

Feiyang Huang<sup>a</sup>, Jian Zhou<sup>b,\*</sup>, and Tao Yang<sup>a,\*</sup>

<sup>a</sup>MOE Key Laboratory for Non-Equilibrium Synthesis and Modulation of Condensed Matter, School of Physics, Xi'an Jiaotong University, Xi'an 710049, Shaanxi, China.

<sup>b</sup>Center for Alloy Innovation and Design, State Key Laboratory for Mechanical Behavior of Materials, Xi'an Jiaotong University, Xi'an 710049, Shaanxi, China

Email: [jianzhou@xjtu.edu.cn](mailto:jianzhou@xjtu.edu.cn); [taoyang1@xjtu.edu.cn](mailto:taoyang1@xjtu.edu.cn)

---

**Contents**

|                                                                                                  |    |
|--------------------------------------------------------------------------------------------------|----|
| The equilibrium geometric structures of $M(C_{60})_3$ ( $M = Sr, Ba$ ).....                      | 2  |
| IR intensity of $M(C_{60})_3$ ( $M = Ca, Sr, Ba$ ) .....                                         | 3  |
| The frontier orbitals of $M(C_{60})_3$ ( $M = Sr, Ba$ ) .....                                    | 4  |
| Hybrid functional test.....                                                                      | 5  |
| EDA-NOCV calculations on $M(C_{60})_3$ ( $M = Ca, Sr, Ba$ ) with Model A.....                    | 6  |
| Spin multiplicity test .....                                                                     | 7  |
| Deformation densities of $Sr(C_{60})_3$ .....                                                    | 8  |
| Deformation densities of $Ba(C_{60})_3$ .....                                                    | 9  |
| Comparison of molecular orbitals with different symmetries and orbital correlation diagrams..... | 10 |
| AIMD simulation in 300 K and 500 K for $Ba(C_{60})_3$ .....                                      | 11 |
| Band structures and tight binding model results of $M(C_{60})_3$ ( $M = Sr, Ba$ ) .....          | 12 |
| Molecular orbital projected density of states (DOS) of $Ca_2(C_{60})_3$ -HL .....                | 13 |
| Coordinates of $M(C_{60})_3$ ( $M = Ca, Sr, Ba$ ) (Gaussian format) .....                        | 14 |
| Coordinates of $M_2(C_{60})_3$ -HL ( $M = Ca, Sr, Ba$ ) (VASP format).....                       | 31 |

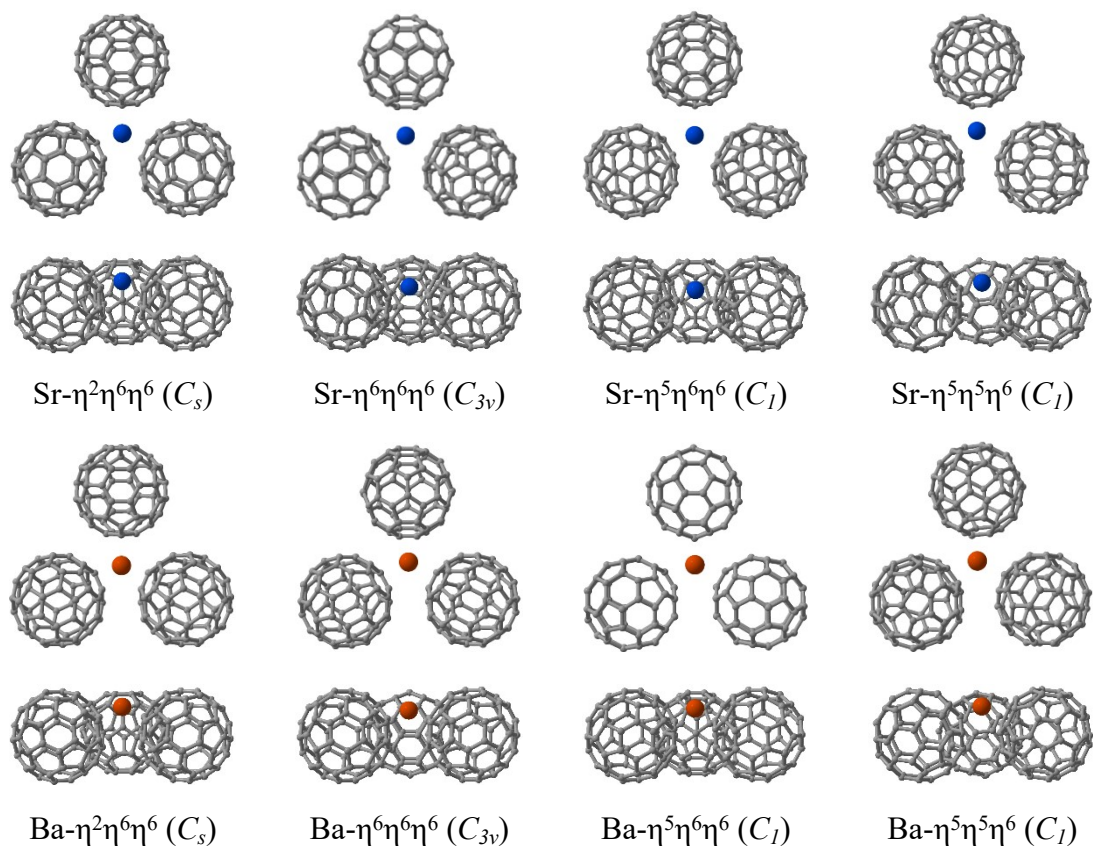

**Fig. S1** The equilibrium geometric structures of  $M(\text{C}_{60})_3$  ( $M = \text{Sr}, \text{Ba}$ ). The upper panels are the top view and the lower panels are the side view. Calculated at the PBE-D3(BJ)/def2-SVP level.

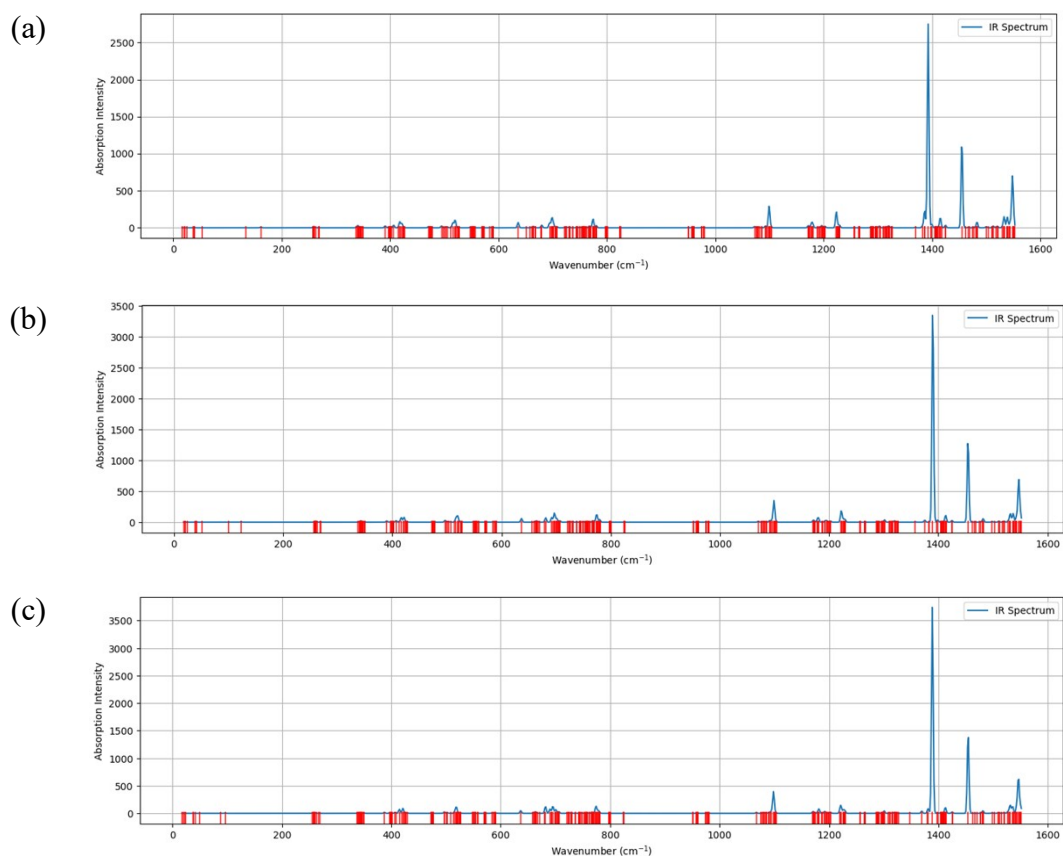

**Fig. S2** Calculated IR intensity of  $\text{M}(\text{C}_{60})_3$  [ $\text{M} = \text{Ca}$  (a),  $\text{Sr}$  (b),  $\text{Ba}$  (c)] at BP86-D3(BJ)/TZP. The unit of absorption intensity is  $\text{km} \cdot \text{mol}^{-1}$ .

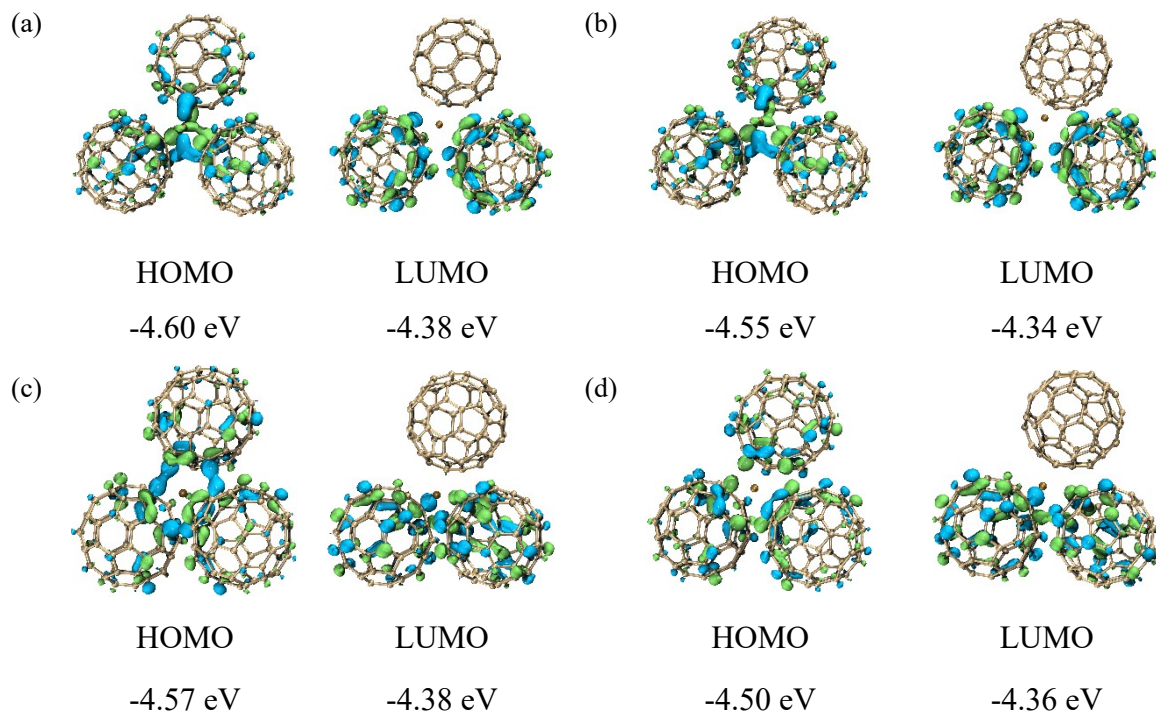

**Fig. S3** The frontier orbitals of (a)  $\text{Sr}(\text{C}_{60})_3$  ( $C_s$ ), (b)  $\text{Sr}(\text{C}_{60})_3$  ( $C_{3v}$ ), (c)  $\text{Ba}(\text{C}_{60})_3$  ( $C_s$ ) and (d)  $\text{Ba}(\text{C}_{60})_3$  ( $C_{3v}$ ) with the isosurface = 0.025 e/bohr<sup>3</sup>. Calculated at the PBE-D3(BJ)/def2-SVP level.

**Table S1.** Calculated HOMO-LUMO gap (eV), binding energy ( $\Delta E_b$ , eV) and root mean square displacement (RMSD, Å) of the two functional optimized structures at B3LYP-D3(BJ)/def2-SVP and PBE-D3(BJ)/def2-SVP levels.  $\Delta E_b$  is defined as  $E[\text{Ca}(\text{C}_{60})_3] - 3E[\text{C}_{60}] - E_{\text{Ca}}$ .

|                                       | HOMO-LUMO gap |      | $\Delta E_b$ |       | RMSD  |
|---------------------------------------|---------------|------|--------------|-------|-------|
|                                       | B3LYP         | PBE  | B3LYP        | PBE   |       |
| $\text{Ca}(\text{C}_{60})_3 (C_s)$    | 0.80          | 0.24 | -4.06        | -4.78 | 0.052 |
| $\text{Ca}(\text{C}_{60})_3 (C_{3v})$ | 0.83          | 0.25 | -3.86        | -4.65 | 0.029 |

**Table S2.** EDA-NOCV calculations on  $M(C_{60})_3$  ( $M = Ca, Sr, Ba$ ) using neutral fragments of metal atoms  $M$  in the singlet state with  $ns^2np^0(n-1)d^0$  electron configuration and  $(C_{60})_3$  (singlet) at BP86-D3 (BJ)/TZ2P (M)~TZP (C) level. All units of energy are kcal mol<sup>-1</sup>.

| Term                                   | Interaction                                            | Ca (S, 4s <sup>2</sup> 4p <sup>0</sup> 3d <sup>0</sup> ) + (C <sub>60</sub> ) <sub>3</sub> (S) | Sr (S, 5s <sup>2</sup> 5p <sup>0</sup> 4d <sup>0</sup> ) + (C <sub>60</sub> ) <sub>3</sub> (S) | Ba (S, 6s <sup>2</sup> 6p <sup>0</sup> 5d <sup>0</sup> ) + (C <sub>60</sub> ) <sub>3</sub> (S) |
|----------------------------------------|--------------------------------------------------------|------------------------------------------------------------------------------------------------|------------------------------------------------------------------------------------------------|------------------------------------------------------------------------------------------------|
| $\Delta E_{\text{int}}$                |                                                        | -91.1                                                                                          | -89.5                                                                                          | -106.0                                                                                         |
| $\Delta E_{\text{Pauli}}$              |                                                        | 470.9                                                                                          | 463.4                                                                                          | 443.3                                                                                          |
| $\Delta E_{\text{disp}}^a$             |                                                        | -9.3 (1.7%)                                                                                    | -12.4 (2.3%)                                                                                   | -15.0 (2.7%)                                                                                   |
| $\Delta E_{\text{elstat}}^a$           |                                                        | -272.0 (48.4%)                                                                                 | -273.8 (49.5%)                                                                                 | -272.4 (49.6%)                                                                                 |
| $\Delta E_{\text{orb}}^a$              |                                                        | -280.7 (49.9%)                                                                                 | -266.7 (48.2%)                                                                                 | -261.9 (47.7%)                                                                                 |
| $\Delta E_{\text{orb}(1)}^b$           | (C <sub>60</sub> ) <sub>3</sub> ← M(s)<br>backdonation | -219.4 (78.2%)                                                                                 | -204.9 (76.8%)                                                                                 | -195.8 (74.8%)                                                                                 |
| $\Delta E_{\text{orb}(2)}^b$           | (C <sub>60</sub> ) <sub>3</sub> → M(d)<br>donation     | -8.6 (3.1%)                                                                                    | -9.4 (3.5%)                                                                                    | -10.5 (4.0%)                                                                                   |
| $\Delta E_{\text{orb}(3)}^b$           | (C <sub>60</sub> ) <sub>3</sub> → M(d)<br>donation     | -8.5 (3.0%)                                                                                    | -9.4 (3.5%)                                                                                    | -10.5 (4.0%)                                                                                   |
| $\Delta E_{\text{orb}(4)}^b$           | (C <sub>60</sub> ) <sub>3</sub> → M(d)<br>donation     | -9.5 (3.4%)                                                                                    | -8.7 (3.3%)                                                                                    | -8.5 (3.2%)                                                                                    |
| $\Delta E_{\text{orb}(5)}^b$           | (C <sub>60</sub> ) <sub>3</sub> → M(d)<br>donation     | -9.5 (3.4%)                                                                                    | -8.7 (3.3%)                                                                                    | -8.5 (3.2%)                                                                                    |
| $\Delta E_{\text{orb}(6)}^b$           |                                                        | -4.0 (1.4%)                                                                                    | -5.0 (1.9%)                                                                                    | -6.5 (2.5%)                                                                                    |
| $\Delta E_{\text{orb}(\text{rest})}^b$ |                                                        | -21.2 (7.5%)                                                                                   | -20.6 (7.7%)                                                                                   | -21.6 (8.3%)                                                                                   |

<sup>a</sup> The values in parentheses give the percentage contribution to the total attractive interactions  $\Delta E_{\text{elstat}} + \Delta E_{\text{orb}} + \Delta E_{\text{disp}}$ .

<sup>b</sup> The values in parentheses give the percentage contribution to the total orbital interactions  $\Delta E_{\text{orb}}$ .

The structures of  $Sr(C_{60})_3$  and  $Ba(C_{60})_3$  were re-optimized under  $C_{3v}$  symmetry to accommodate the EDA analysis, which necessitates higher symmetry for the accurate assignment of electron occupations. The molecular orbitals comparison is depicted in Fig. S5 (a), suggesting that the influence of imposing symmetry constraints on orbital characteristics is minimal. Similarly, to accurately specify electron occupations,  $D_3$  symmetry was adopted in the calculations for metal atom fragments, facilitating the distinction between  $d_{z^2}$  and  $p_z$  orbitals, which possess closely related energies.

**Table S3.** Calculated singlet–triplet (and singlet–quintet) splitting energy of  $M(C_{60})_3 (C_{3v})$  ( $M = \text{Ca, Sr, Ba}$ ) at BP86-D3(BJ)/TZP level. The splitting energy is defined as  $E_{\text{triplet(quintet)}} - E_{\text{singlet}}$  (eV).

|                                | Singlet–Triplet Splitting Energy | Singlet–Quintet Splitting Energy |
|--------------------------------|----------------------------------|----------------------------------|
| $\text{Ca}(C_{60})_3 (C_{3v})$ | 0.19                             | 1.33                             |
| $\text{Sr}(C_{60})_3 (C_{3v})$ | 0.14                             | 1.34                             |
| $\text{Ba}(C_{60})_3 (C_{3v})$ | 0.11                             | 1.30                             |

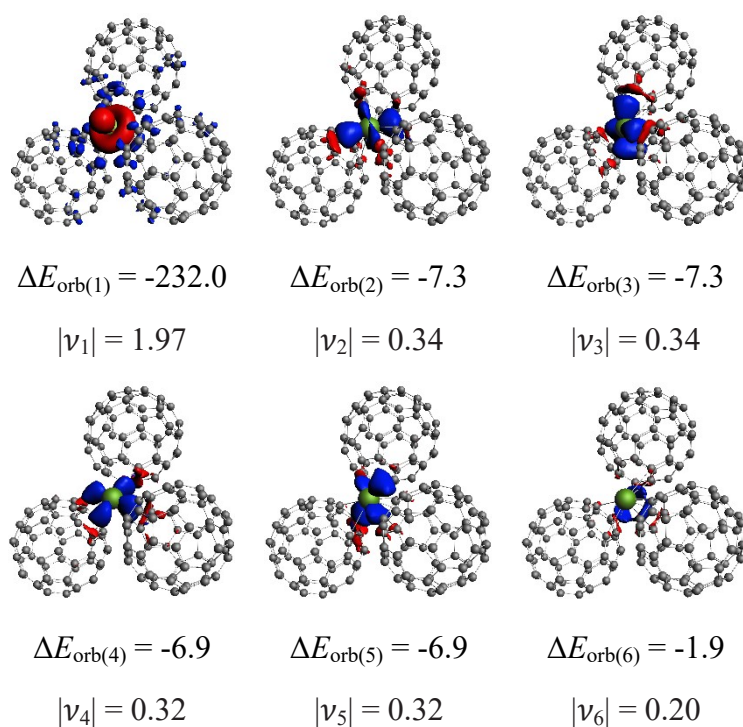

**Fig. S4** Plot of deformation densities  $\Delta\rho_{1-6}$   $\text{Sr}(\text{C}_{60})_3$  with the association interaction energies  $\Delta E$  (in  $\text{kcal mol}^{-1}$ ) and their energy eigenvalues  $\nu$  (in e) which indicates the amount of donated and accepted charges, respectively. The direction of the charge flow is red to blue. The isosurface values are 0.002 for  $\Delta\rho_1$  and 0.0006 e/bohr<sup>3</sup> for  $\Delta\rho_{2-6}$ .



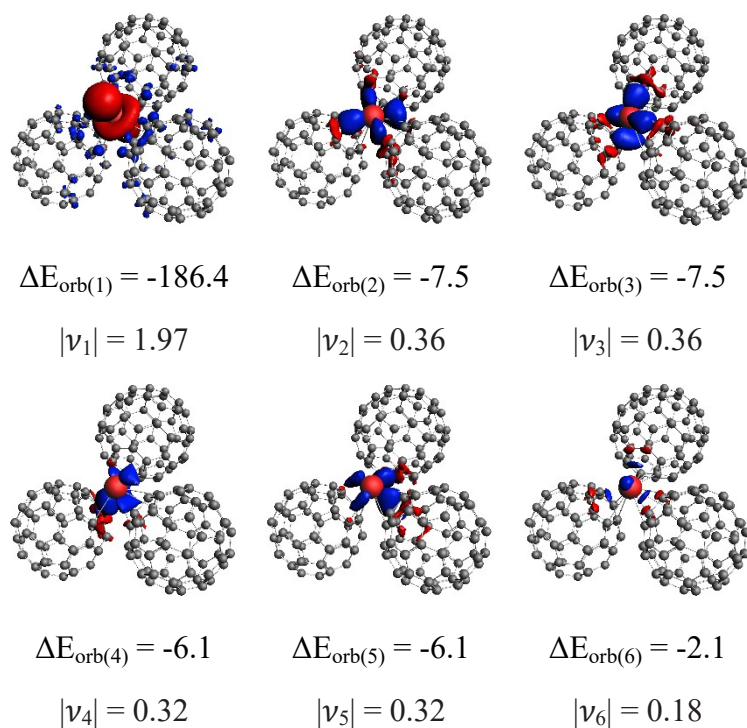

**Fig. S5** Plot of deformation densities  $\Delta\rho_{1-6}$   $\text{Ba}(\text{C}_{60})_3$  with the association interaction energies  $\Delta E$  (in  $\text{kcal mol}^{-1}$ ) and their energy eigenvalues  $\nu$  (in  $e$ ) which indicates the amount of donated and accepted charges, respectively. The direction of the charge flow is red to blue. The isosurface values are 0.002 for  $\Delta\rho_1$  and 0.0006  $e/\text{bohr}^3$  for  $\Delta\rho_{2-6}$ .

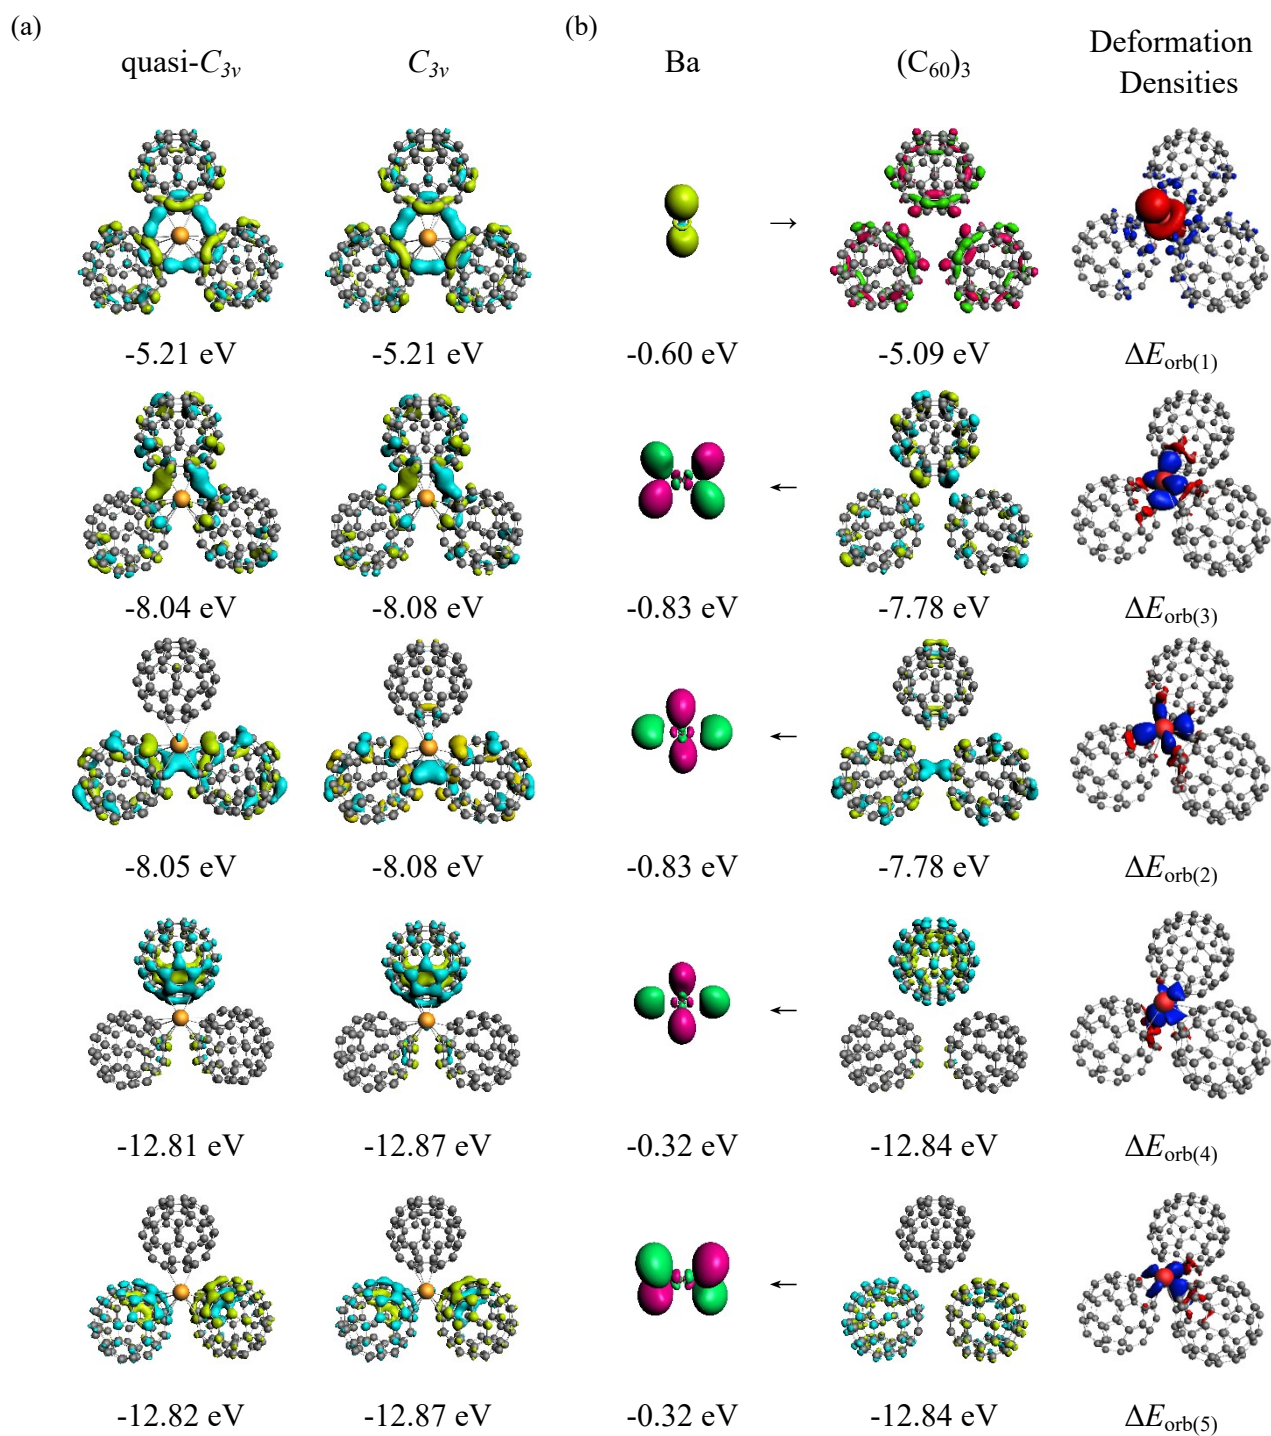

**Fig. S6** (a) Molecular orbital diagrams and energy levels of  $Ba(C_{60})_3$  (quasi- $C_{3v}$ ) and  $Ba(C_{60})_3$  ( $C_{3v}$ ).

(b) Coordination-related orbital correlation diagrams and corresponding deformation densities of  $Ba(C_{60})_3$  ( $C_{3v}$ ). Calculated at the BP86-D3(BJ)/TZP level.

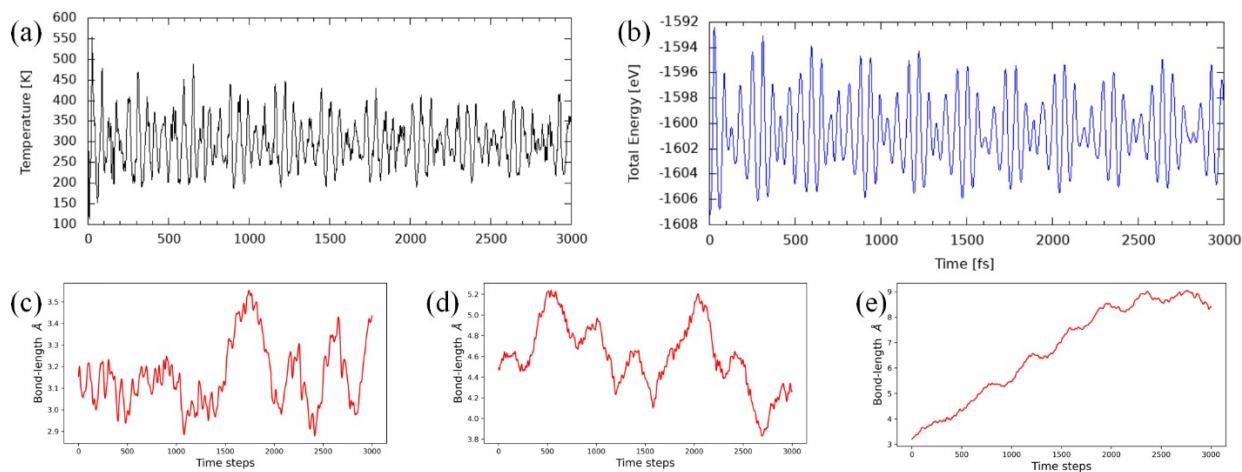

**Fig. S7** Results of the AIMD simulation in 300 K for  $\text{Ba}(\text{C}_{60})_3$ , where represents the temperature (a), energy (b), and changes in distance from metal atoms to the centers of three fullerenes hexagonal rings [(c) to (e)]. The AIMD simulation was conducted with a timestep of 1 fs and a total duration of 3 ps.

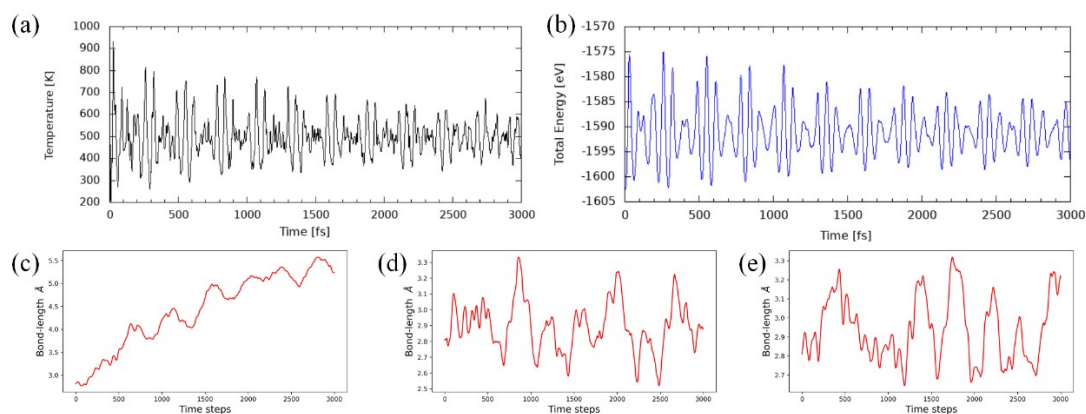

**Fig. S8** Results of the AIMD simulation in 500K for  $\text{Ba}(\text{C}_{60})_3$ , where represents the temperature (a), energy (b), and changes in distance from metal atoms to the centers of three fullerenes hexagonal rings [(c) to (e)]. The AIMD simulation was conducted with a timestep of 1 fs and a total duration of 3 ps.

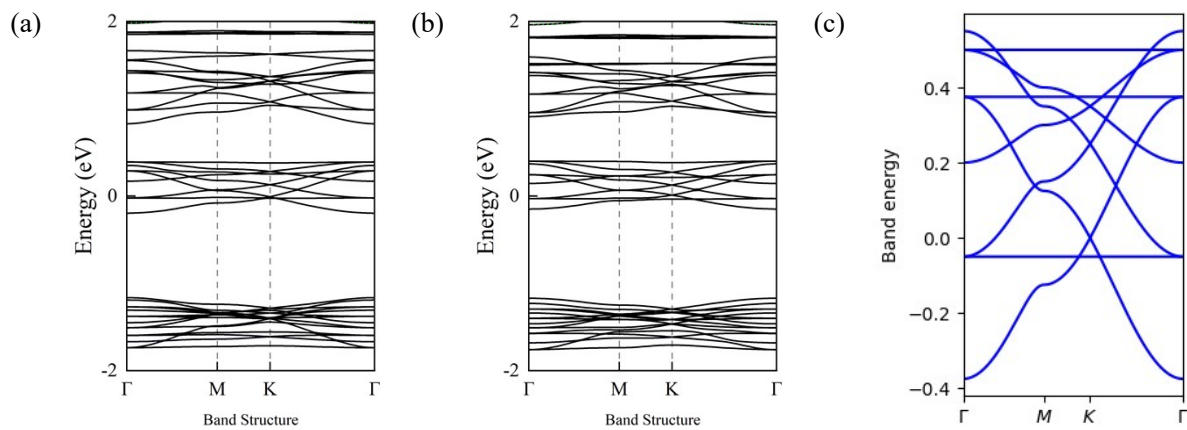

**Fig. S9** (a) and (b) Band structures of  $\text{Sr}_2(\text{C}_{60})_3\text{-HL}$  and  $\text{Ba}_2(\text{C}_{60})_3\text{-HL}$ , respectively. (c) Bands near the fermi level calculated by tight binding model.

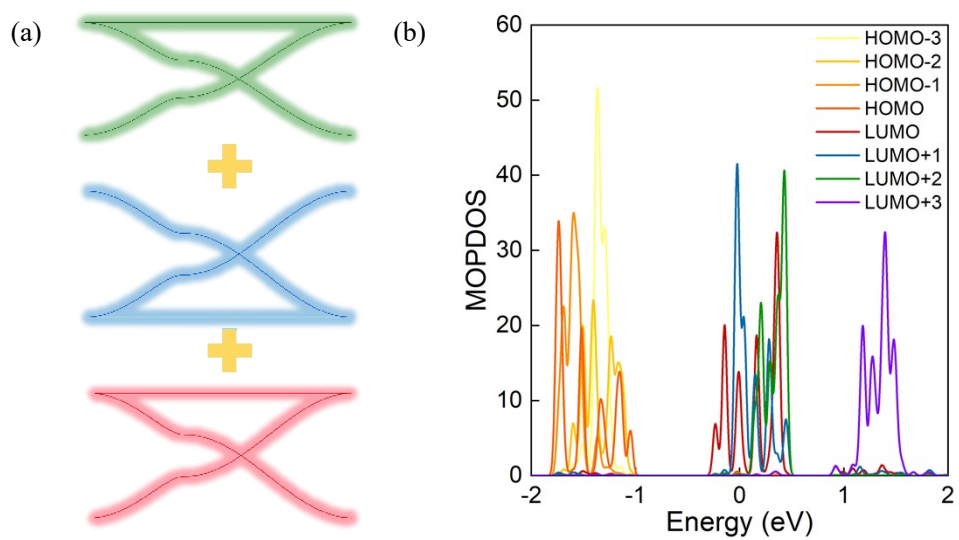

**Fig. S10** (a) Schematic diagram of three sets of Kagome lattice bands. (b) Molecular orbital projected density of states (DOS) of  $\text{Ca}_2(\text{C}_{60})_3\text{-HL}$ .

Geometric coordinates of the most stable configuration of  $M(C_{60})_3$  ( $M = Ca, Sr, Ba$ ) (Gaussian format)

|                                             |             |             |            |   |             |             |             |
|---------------------------------------------|-------------|-------------|------------|---|-------------|-------------|-------------|
| (1) $Ca(C_{60})_3 \eta^2\eta^6\eta^6 (C_s)$ |             |             |            | C | -3.97374500 | -2.79666500 | 3.09450400  |
| PEB-D3(BJ)/def2-SVP, Singlet                |             |             |            | C | -2.22492400 | -3.48726000 | 5.25785200  |
| Ca                                          | -0.40051900 | -0.85385700 | 0.00000000 | C | -6.34543800 | 0.60835500  | 4.93338000  |
| C                                           | -0.67307100 | 2.01409600  | 2.92497500 | C | -3.72761300 | 1.88249500  | 7.87484400  |
| C                                           | -0.86113500 | 0.83409700  | 2.09512000 | C | -5.02839100 | 1.61082700  | 7.27197000  |
| C                                           | -1.75204700 | 2.89414400  | 3.14820500 | C | -1.18469100 | -0.65017100 | 8.07916600  |
| C                                           | 0.20515400  | 1.65051600  | 4.03261600 | C | -1.55514000 | -2.97663900 | 6.45112300  |
| C                                           | -2.14143300 | 0.56204400  | 1.52611400 | C | -2.98520900 | 0.82930700  | 8.44494500  |
| C                                           | -0.12644800 | -0.26149400 | 2.72471500 | C | -5.63203900 | -2.15490800 | 4.64067800  |
| C                                           | -3.06220000 | 2.61684400  | 2.54723300 | C | -4.52137900 | -3.07340100 | 4.40937200  |
| C                                           | -1.97569300 | 3.44747200  | 4.46939600 | C | -3.66228700 | -3.41642400 | 5.47733300  |
| C                                           | 0.56548600  | 0.24924800  | 3.89447600 | C | -6.20642100 | -0.21002700 | 6.06936600  |
| C                                           | -0.00922100 | 2.19209300  | 5.31403400 | C | -5.53908700 | 0.30027800  | 7.26097400  |
| C                                           | -3.25386300 | 1.48145300  | 1.74343300 | C | -2.40323900 | -1.44202100 | 8.20457700  |
| C                                           | -2.66954200 | -0.78662600 | 1.53659000 | C | -2.58347000 | -2.58443100 | 7.40427500  |
| C                                           | -0.61825900 | -1.57999600 | 2.70066300 | C | -3.51403000 | -0.52671700 | 8.43423500  |
| C                                           | -4.08886600 | 3.01120600  | 3.49924900 | C | -5.84452000 | -1.61412800 | 5.92057900  |
| C                                           | -3.41648900 | 3.51631100  | 4.69117300 | C | -3.88518600 | -2.85550200 | 6.80048500  |
| C                                           | -1.11603000 | 3.10736100  | 5.54025200 | C | -4.77098500 | -0.78918300 | 7.85208600  |
| C                                           | 0.70289800  | -0.57869000 | 5.02795400 | C | -4.95794900 | -1.97099100 | 7.02356700  |
| C                                           | 0.12948400  | 1.34017100  | 6.49420400 | C | -3.25386300 | 1.48145300  | -1.74343300 |
| C                                           | -4.46888800 | 0.68774600  | 1.87175300 | C | -2.14143300 | 0.56204400  | -1.52611400 |
| C                                           | -4.11131900 | -0.71651500 | 1.72987700 | C | -3.06220000 | 2.61684400  | -2.54723300 |
| C                                           | -1.91737600 | -1.86671800 | 2.06964000 | C | -4.46888800 | 0.68774600  | -1.87175300 |
| C                                           | -0.46816100 | -2.43745800 | 3.86179800 | C | -0.86113500 | 0.83409700  | -2.09512000 |
| C                                           | -5.26796100 | 2.24744900  | 3.62450300 | C | -2.66954200 | -0.78662600 | -1.53659000 |
| C                                           | -3.94803000 | 3.24545600  | 5.96383700 | C | -1.75204700 | 2.89414400  | -3.14820500 |
| C                                           | -1.67004400 | 2.82295000  | 6.85473600 | C | -4.08886600 | 3.01120600  | -3.49924900 |
| C                                           | 0.47901600  | -0.01596100 | 6.35390300 | C | -4.11131900 | -0.71651500 | -1.72987700 |
| C                                           | 0.17856500  | -1.93477400 | 5.01381900 | C | -5.46259300 | 1.06626100  | -2.79591900 |
| C                                           | -0.90025400 | 1.73201800  | 7.44619400 | C | -0.67307100 | 2.01409600  | -2.92497500 |
| C                                           | -5.46259300 | 1.06626100  | 2.79591900 | C | -0.12644800 | -0.26149400 | -2.72471500 |
| C                                           | -4.74389100 | -1.69779800 | 2.51153300 | C | -1.91737600 | -1.86671800 | -2.06964000 |
| C                                           | -2.58036100 | -2.87567900 | 2.87780700 | C | -1.97569300 | 3.44747200  | -4.46939600 |
| C                                           | -1.68962900 | -3.21994200 | 3.98315700 | C | -3.41648900 | 3.51631100  | -4.69117300 |
| C                                           | -5.81595400 | 1.96632400  | 4.94458400 | C | -5.26796100 | 2.24744900  | -3.62450300 |
| C                                           | -3.06046000 | 2.89216200  | 7.06732700 | C | -4.74389100 | -1.69779800 | -2.51153300 |
| C                                           | -5.16792200 | 2.45752200  | 6.09385100 | C | -6.12299300 | 0.04983500  | -3.60554200 |
| C                                           | -0.18974700 | -1.02939700 | 7.16120100 | C | 0.20515400  | 1.65051600  | -4.03261600 |
| C                                           | -0.37749900 | -2.21460800 | 6.33038900 | C | 0.56548600  | 0.24924800  | -3.89447600 |
| C                                           | -1.54599000 | 0.75505600  | 8.22572200 | C | -0.61825900 | -1.57999600 | -2.70066300 |
| C                                           | -6.12299300 | 0.04983500  | 3.60554200 | C | -2.58036100 | -2.87567900 | -2.87780700 |
| C                                           | -5.77638900 | -1.30809400 | 3.46213400 | C | -1.11603000 | 3.10736100  | -5.54025200 |

|   |             |             |             |   |            |             |             |
|---|-------------|-------------|-------------|---|------------|-------------|-------------|
| C | -3.94803000 | 3.24545600  | -5.96383700 | C | 6.06951800 | -3.46325800 | -0.70336000 |
| C | -5.81595400 | 1.96632400  | -4.94458400 | C | 2.80708400 | -1.76261100 | 1.18041200  |
| C | -5.77638900 | -1.30809400 | -3.46213400 | C | 4.84728600 | -3.15233100 | 1.43622800  |
| C | -3.97374500 | -2.79666500 | -3.09450400 | C | 4.37950900 | -1.32426000 | -3.04471600 |
| C | -6.34543800 | 0.60835500  | -4.93338000 | C | 2.99492600 | 0.44351100  | -2.31570100 |
| C | -0.00922100 | 2.19209300  | -5.31403400 | C | 2.09499600 | 0.32513100  | 0.00000000  |
| C | 0.70289800  | -0.57869000 | -5.02795400 | C | 6.65750200 | -2.21035100 | -2.61336400 |
| C | -0.46816100 | -2.43745800 | -3.86179800 | C | 7.19043500 | -2.88125700 | -1.43254000 |
| C | -1.68962900 | -3.21994200 | -3.98315700 | C | 6.06951800 | -3.46325800 | 0.70336000  |
| C | -1.67004400 | 2.82295000  | -6.85473600 | C | 3.16745200 | -1.01111900 | 2.31261500  |
| C | -5.16792200 | 2.45752200  | -6.09385100 | C | 5.21086800 | -2.38078200 | 2.61417300  |
| C | -3.06046000 | 2.89216200  | -7.06732700 | C | 4.96794100 | -0.06620300 | -3.49291300 |
| C | -5.63203900 | -2.15490800 | -4.64067800 | C | 4.10876100 | 1.02550100  | -3.04663800 |
| C | -4.52137900 | -3.07340100 | -4.40937200 | C | 2.48102800 | 1.09415100  | -1.17781300 |
| C | -6.20642100 | -0.21002700 | -6.06936600 | C | 2.48102800 | 1.09415100  | 1.17781300  |
| C | 0.12948400  | 1.34017100  | -6.49420400 | C | 7.22495700 | -0.99640500 | -3.04543400 |
| C | 0.47901600  | -0.01596100 | -6.35390300 | C | 8.26922300 | -2.31647000 | -0.72900700 |
| C | 0.17856500  | -1.93477400 | -5.01381900 | C | 7.19043500 | -2.88125700 | 1.43254000  |
| C | -2.22492400 | -3.48726000 | -5.25785200 | C | 4.37950900 | -1.32426000 | 3.04471600  |
| C | -0.90025400 | 1.73201800  | -7.44619400 | C | 2.99492600 | 0.44351100  | 2.31570100  |
| C | -5.02839100 | 1.61082700  | -7.27197000 | C | 6.65750200 | -2.21035100 | 2.61336400  |
| C | -3.72761300 | 1.88249500  | -7.87484400 | C | 6.36406900 | 0.09468900  | -3.49353100 |
| C | -5.84452000 | -1.61412800 | -5.92057900 | C | 4.67769200 | 2.24078700  | -2.61474300 |
| C | -3.66228700 | -3.41642400 | -5.47733300 | C | 3.06630600 | 2.34959300  | -0.72796500 |
| C | -5.53908700 | 0.30027800  | -7.26097400 | C | 3.06630600 | 2.34959300  | 0.72796500  |
| C | -0.18974700 | -1.02939700 | -7.16120100 | C | 8.34196800 | -0.41311200 | -2.31709500 |
| C | -0.37749900 | -2.21460800 | -6.33038900 | C | 8.26922300 | -2.31647000 | 0.72900700  |
| C | -1.55514000 | -2.97663900 | -6.45112300 | C | 8.85831300 | -1.06070600 | -1.17882200 |
| C | -1.54599000 | 0.75505600  | -8.22572200 | C | 4.96794100 | -0.06620300 | 3.49291300  |
| C | -2.98520900 | 0.82930700  | -8.44494500 | C | 4.10876100 | 1.02550100  | 3.04663800  |
| C | -4.95794900 | -1.97099100 | -7.02356700 | C | 7.22495700 | -0.99640500 | 3.04543400  |
| C | -3.88518600 | -2.85550200 | -6.80048500 | C | 6.95353300 | 1.35109400  | -3.04643000 |
| C | -4.77098500 | -0.78918300 | -7.85208600 | C | 6.12381500 | 2.40508600  | -2.61435600 |
| C | -1.18469100 | -0.65017100 | -8.07916600 | C | 4.14630700 | 2.91297300  | -1.43405300 |
| C | -2.58347000 | -2.58443100 | -7.40427500 | C | 4.14630700 | 2.91297300  | 1.43405300  |
| C | -3.51403000 | -0.52671700 | -8.43423500 | C | 8.17361000 | 1.03705100  | -2.31641300 |
| C | -2.40323900 | -1.44202100 | -8.20457700 | C | 8.85831300 | -1.06070600 | 1.17882200  |
| C | 3.66573200  | -2.84850500 | -0.72774500 | C | 9.22257100 | -0.28549100 | 0.00000000  |
| C | 2.80708400  | -1.76261100 | -1.18041200 | C | 6.36406900 | 0.09468900  | 3.49353100  |
| C | 4.84728600  | -3.15233100 | -1.43622800 | C | 4.67769200 | 2.24078700  | 2.61474300  |
| C | 3.66573200  | -2.84850500 | 0.72774500  | C | 8.34196800 | -0.41311200 | 2.31709500  |
| C | 3.16745200  | -1.01111900 | -2.31261500 | C | 6.48890800 | 3.17945000  | -1.43417800 |
| C | 2.23555100  | -1.10483600 | 0.00000000  | C | 5.26558600 | 3.49365400  | -0.70387900 |
| C | 5.21086800  | -2.38078200 | -2.61417300 | C | 5.26558600 | 3.49365400  | 0.70387900  |

|                                                                |             |             |             |   |             |             |             |
|----------------------------------------------------------------|-------------|-------------|-------------|---|-------------|-------------|-------------|
| C                                                              | 8.52620600  | 1.78468800  | -1.17788400 | C | -3.55055000 | 2.04991100  | 3.19863000  |
| C                                                              | 9.06080400  | 1.11430200  | 0.00000000  | C | -7.27806000 | 1.52466600  | -2.34661700 |
| C                                                              | 6.95353300  | 1.35109400  | 3.04643000  | C | -6.21386200 | 4.94909400  | -2.58072000 |
| C                                                              | 6.12381500  | 2.40508600  | 2.61435600  | C | -7.39297200 | 2.90681500  | -2.58072000 |
| C                                                              | 8.17361000  | 1.03705100  | 2.31641300  | C | -4.06287100 | 5.85827400  | 1.68024100  |
| C                                                              | 7.66693300  | 2.87480000  | -0.72900000 | C | -3.78720900 | 4.85961300  | 2.70763300  |
| C                                                              | 6.48890800  | 3.17945000  | 1.43417800  | C | -5.71726600 | 6.31500500  | -0.11337300 |
| C                                                              | 8.52620600  | 1.78468800  | 1.17788400  | C | -6.83304000 | -0.10001900 | -0.69288900 |
| C                                                              | 7.66693300  | 2.87480000  | 0.72900000  | C | -6.50931400 | -0.27949200 | 0.67111200  |
|                                                                |             |             |             | C | -4.88467200 | 0.15003600  | 2.32846700  |
|                                                                |             |             |             | C | -4.73010000 | 2.73092400  | 3.56615200  |
| (2) $\text{Ca}(\text{C}_{60})_3 \eta^6 \eta^6 \eta^6 (C_{3v})$ |             |             |             | C | -7.75322100 | 0.95448300  | -1.08814200 |
| PBE-D3(BJ)/def2-SVP, Singlet                                   |             |             |             | C | -7.26271100 | 5.03300700  | -1.57180900 |
| Ca                                                             | 0.00000000  | 0.00000000  | 0.48720300  | C | -7.99006700 | 3.77318900  | -1.57180900 |
| C                                                              | -1.92141200 | 2.77283600  | -1.95110400 | C | -5.38844400 | 6.12280000  | 1.29574200  |
| C                                                              | -1.67028800 | 1.77805100  | -0.91924900 | C | -4.84933100 | 4.15967200  | 3.31453700  |
| C                                                              | -2.89548400 | 2.51303100  | -2.93747800 | C | -7.01529900 | 5.70541900  | -0.35820300 |
| C                                                              | -1.84417500 | 4.08047300  | -1.31764800 | C | -7.10485000 | 0.58941300  | 1.68024100  |
| C                                                              | -2.37498100 | 0.55748600  | -0.91924900 | C | -6.10215300 | 0.85001300  | 2.70763300  |
| C                                                              | -1.39206800 | 2.46797500  | 0.34022600  | C | -6.02704700 | 2.11980800  | 3.31453700  |
| C                                                              | -3.62409100 | 1.25104700  | -2.93747800 | C | -8.32758800 | 1.79379500  | -0.11337300 |
| C                                                              | -3.81924400 | 3.56827000  | -3.33279300 | C | -8.44868700 | 3.22271800  | -0.35820300 |
| C                                                              | -1.51869600 | 3.89311300  | 0.09205100  | C | -6.48784000 | 5.39859300  | 1.92297600  |
| C                                                              | -2.73685900 | 5.09976900  | -1.69976500 | C | -6.22353600 | 4.43480500  | 2.91328600  |
| C                                                              | -3.36205200 | 0.27757400  | -1.95110400 | C | -7.49137300 | 5.13733700  | 0.89801400  |
| C                                                              | -2.83336300 | -0.02842100 | 0.34022600  | C | -7.99672200 | 1.60512900  | 1.29574200  |
| C                                                              | -1.85898500 | 1.90874200  | 1.56301100  | C | -6.95242200 | 3.17233800  | 2.91328600  |
| C                                                              | -4.99983400 | 1.52342700  | -3.33279300 | C | -8.19475100 | 3.91905100  | 0.89801400  |
| C                                                              | -5.12062400 | 2.95639300  | -3.57739400 | C | -7.91923900 | 2.91933800  | 1.92297600  |
| C                                                              | -3.74243800 | 4.83577500  | -2.72498600 | C | -1.44064000 | -3.05041000 | -1.95110400 |
| C                                                              | -2.09138300 | 4.72980300  | 1.06860000  | C | -0.70469300 | -2.33553700 | -0.91924900 |
| C                                                              | -3.32990100 | 5.96759600  | -0.69288900 | C | -0.72860700 | -3.76407800 | -2.93747800 |
| C                                                              | -4.45588100 | -0.44313400 | -1.31764800 | C | -2.61170600 | -3.63733900 | -1.31764800 |
| C                                                              | -4.13088300 | -0.63132700 | 0.09205100  | C | 0.70469300  | -2.33553700 | -0.91924900 |
| C                                                              | -2.58251200 | 0.65555700  | 1.56301100  | C | -1.44129500 | -2.43955400 | 0.34022600  |
| C                                                              | -2.45312900 | 2.77725600  | 2.57827300  | C | 0.72860700  | -3.76407800 | -2.93747800 |
| C                                                              | -6.05912300 | 0.82315900  | -2.72498600 | C | -1.18059000 | -5.09169700 | -3.33279300 |
| C                                                              | -6.29517600 | 3.63452200  | -3.20751300 | C | -2.61218700 | -3.26178600 | 0.09205100  |
| C                                                              | -4.95942900 | 5.54065200  | -2.34661700 | C | -3.04810000 | -4.92007400 | -1.69976500 |
| C                                                              | -3.01261000 | 5.77697700  | 0.67111200  | C | 1.44064000  | -3.05041000 | -1.95110400 |
| C                                                              | -2.57227100 | 4.15523200  | 2.32846700  | C | 1.44129500  | -2.43955400 | 0.34022600  |
| C                                                              | -4.70321700 | 6.23724500  | -1.08814200 | C | -0.72352700 | -2.56429900 | 1.56301100  |
| C                                                              | -5.78495900 | -0.17969500 | -1.69976500 | C | 1.18059000  | -5.09169700 | -3.33279300 |
| C                                                              | -5.14182100 | -0.55371100 | 1.06860000  | C | 0.00000000  | -5.91278700 | -3.57739400 |
| C                                                              | -3.63173900 | 0.73584400  | 2.57827300  |   |             |             |             |



|   |             |             |             |   |            |             |             |
|---|-------------|-------------|-------------|---|------------|-------------|-------------|
| C | -2.31668500 | -5.65893400 | -2.72498600 | C | 1.43139900 | -8.31793100 | 1.92297600  |
| C | -3.05043800 | -4.17609200 | 1.06860000  | C | 3.36205200 | 0.27757400  | -1.95110400 |
| C | -3.50313900 | -5.86757700 | -0.69288900 | C | 2.37498100 | 0.55748600  | -0.91924900 |
| C | 2.61170600  | -3.63733900 | -1.31764800 | C | 3.62409100 | 1.25104700  | -2.93747800 |
| C | 2.61218700  | -3.26178600 | 0.09205100  | C | 4.45588100 | -0.44313400 | -1.31764800 |
| C | 0.72352700  | -2.56429900 | 1.56301100  | C | 1.67028800 | 1.77805100  | -0.91924900 |
| C | -1.17861000 | -3.51310000 | 2.57827300  | C | 2.83336300 | -0.02842100 | 0.34022600  |
| C | 2.31668500  | -5.65893400 | -2.72498600 | C | 2.89548400 | 2.51303100  | -2.93747800 |
| C | 0.00000000  | -7.26904300 | -3.20751300 | C | 4.99983400 | 1.52342700  | -3.33279300 |
| C | -2.31863100 | -7.06531700 | -2.34661700 | C | 4.13088300 | -0.63132700 | 0.09205100  |
| C | -3.49670400 | -5.49748500 | 0.67111200  | C | 5.78495900 | -0.17969500 | -1.69976500 |
| C | -2.31240100 | -4.30526800 | 2.32846700  | C | 1.92141200 | 2.77283600  | -1.95110400 |
| C | -3.05000400 | -7.19172800 | -1.08814200 | C | 1.39206800 | 2.46797500  | 0.34022600  |
| C | 3.04810000  | -4.92007400 | -1.69976500 | C | 2.58251200 | 0.65555700  | 1.56301100  |
| C | 3.05043800  | -4.17609200 | 1.06860000  | C | 3.81924400 | 3.56827000  | -3.33279300 |
| C | 1.17861000  | -3.51310000 | 2.57827300  | C | 5.12062400 | 2.95639300  | -3.57739400 |
| C | 0.00000000  | -4.09982200 | 3.19863000  | C | 6.05912300 | 0.82315900  | -2.72498600 |
| C | 2.31863100  | -7.06531700 | -2.34661700 | C | 5.14182100 | -0.55371100 | 1.06860000  |
| C | -1.17911000 | -7.85590900 | -2.58072000 | C | 6.83304000 | -0.10001900 | -0.69288900 |
| C | 1.17911000  | -7.85590900 | -2.58072000 | C | 1.84417500 | 4.08047300  | -1.31764800 |
| C | -3.04197900 | -6.44768600 | 1.68024100  | C | 1.51869600 | 3.89311300  | 0.09205100  |
| C | -2.31494400 | -5.70962600 | 2.70763300  | C | 1.85898500 | 1.90874200  | 1.56301100  |
| C | -2.61032200 | -8.10880000 | -0.11337300 | C | 3.63173900 | 0.73584400  | 2.57827300  |
| C | 3.50313900  | -5.86757700 | -0.69288900 | C | 3.74243800 | 4.83577500  | -2.72498600 |
| C | 3.49670400  | -5.49748500 | 0.67111200  | C | 6.29517600 | 3.63452200  | -3.20751300 |
| C | 2.31240100  | -4.30526800 | 2.32846700  | C | 7.27806000 | 1.52466600  | -2.34661700 |
| C | 0.00000000  | -5.46184900 | 3.56615200  | C | 6.50931400 | -0.27949200 | 0.67111200  |
| C | 3.05000400  | -7.19172800 | -1.08814200 | C | 4.88467200 | 0.15003600  | 2.32846700  |
| C | -0.72735600 | -8.80619600 | -1.57180900 | C | 7.75322100 | 0.95448300  | -1.08814200 |
| C | 0.72735600  | -8.80619600 | -1.57180900 | C | 2.73685900 | 5.09976900  | -1.69976500 |
| C | -2.60827800 | -7.72792900 | 1.29574200  | C | 2.09138300 | 4.72980300  | 1.06860000  |
| C | -1.17771600 | -6.27948000 | 3.31453700  | C | 2.45312900 | 2.77725600  | 2.57827300  |
| C | -1.43338800 | -8.92813700 | -0.35820300 | C | 3.55055000 | 2.04991100  | 3.19863000  |
| C | 3.04197900  | -6.44768600 | 1.68024100  | C | 4.95942900 | 5.54065200  | -2.34661700 |
| C | 2.31494400  | -5.70962600 | 2.70763300  | C | 7.39297200 | 2.90681500  | -2.58072000 |
| C | 1.17771600  | -6.27948000 | 3.31453700  | C | 6.21386200 | 4.94909400  | -2.58072000 |
| C | 2.61032200  | -8.10880000 | -0.11337300 | C | 7.10485000 | 0.58941300  | 1.68024100  |
| C | 1.43338800  | -8.92813700 | -0.35820300 | C | 6.10215300 | 0.85001300  | 2.70763300  |
| C | -1.43139900 | -8.31793100 | 1.92297600  | C | 8.32758800 | 1.79379500  | -0.11337300 |
| C | -0.72888600 | -7.60714300 | 2.91328600  | C | 3.32990100 | 5.96759600  | -0.69288900 |
| C | -0.70337800 | -9.05638800 | 0.89801400  | C | 3.01261000 | 5.77697700  | 0.67111200  |
| C | 2.60827800  | -7.72792900 | 1.29574200  | C | 2.57227100 | 4.15523200  | 2.32846700  |
| C | 0.72888600  | -7.60714300 | 2.91328600  | C | 4.73010000 | 2.73092400  | 3.56615200  |
| C | 0.70337800  | -9.05638800 | 0.89801400  | C | 4.70321700 | 6.23724500  | -1.08814200 |

|                                                                                                      |             |             |             |   |             |             |             |
|------------------------------------------------------------------------------------------------------|-------------|-------------|-------------|---|-------------|-------------|-------------|
| C                                                                                                    | 7.99006700  | 3.77318900  | -1.57180900 | C | -3.74367000 | 3.47635700  | 5.41367000  |
| C                                                                                                    | 7.26271100  | 5.03300700  | -1.57180900 | C | -1.52381500 | 3.02949100  | 6.43132300  |
| C                                                                                                    | 7.99672200  | 1.60512900  | 1.29574200  | C | 0.41604900  | 0.00233300  | 6.42882700  |
| C                                                                                                    | 6.02704700  | 2.11980800  | 3.31453700  | C | 0.00144300  | -2.06991200 | 5.37902400  |
| C                                                                                                    | 8.44868700  | 3.22271800  | -0.35820300 | C | -0.85149500 | 1.98888200  | 7.20378700  |
| C                                                                                                    | 4.06287100  | 5.85827400  | 1.68024100  | C | -5.34755100 | 0.95722900  | 2.55751900  |
| C                                                                                                    | 3.78720900  | 4.85961300  | 2.70763300  | C | -4.83466800 | -1.86308600 | 2.70855300  |
| C                                                                                                    | 4.84933100  | 4.15967200  | 3.31453700  | C | -2.77316900 | -3.12109000 | 3.31659200  |
| C                                                                                                    | 5.71726600  | 6.31500500  | -0.11337300 | C | -1.93542000 | -3.35883000 | 4.48970700  |
| C                                                                                                    | 7.01529900  | 5.70541900  | -0.35820300 | C | -5.68130700 | 2.19471800  | 4.53439500  |
| C                                                                                                    | 7.91923900  | 2.91933800  | 1.92297600  | C | -2.90950400 | 3.22961900  | 6.58597700  |
| C                                                                                                    | 6.95242200  | 3.17233800  | 2.91328600  | C | -5.02244500 | 2.80587500  | 5.61869000  |
| C                                                                                                    | 8.19475100  | 3.91905100  | 0.89801400  | C | -0.34593400 | -0.82703400 | 7.35493600  |
| C                                                                                                    | 5.38844400  | 6.12280000  | 1.29574200  | C | -0.60358100 | -2.10692300 | 6.70303400  |
| C                                                                                                    | 6.22353600  | 4.43480500  | 2.91328600  | C | -1.58600400 | 1.18968600  | 8.09877500  |
| C                                                                                                    | 7.49137300  | 5.13733700  | 0.89801400  | C | -6.10199900 | 0.12411600  | 3.48590500  |
| C                                                                                                    | 6.48784000  | 5.39859300  | 1.92297600  | C | -5.85487900 | -1.26050600 | 3.55722200  |
| (3) Sr(C <sub>60</sub> ) <sub>3</sub> η <sup>2</sup> η <sup>6</sup> η <sup>6</sup> (C <sub>s</sub> ) |             |             |             | C | -4.16188100 | -2.91123700 | 3.47420400  |
| PBE-D3(BJ)/def2-SVP, Singlet                                                                         |             |             |             | C | -2.51751900 | -3.39079600 | 5.77143700  |
| Sr                                                                                                   | -0.32422000 | -1.68830600 | 0.00000000  | C | -6.31133700 | 0.89129500  | 4.70796500  |
| C                                                                                                    | -0.50712900 | 1.56744800  | 2.70375600  | C | -3.66860300 | 2.40394800  | 7.51202000  |
| C                                                                                                    | -0.76247900 | 0.29306600  | 2.05162200  | C | -4.97291300 | 2.13837100  | 6.91309600  |
| C                                                                                                    | -1.51903000 | 2.54853800  | 2.75627600  | C | -1.32913300 | -0.24393000 | 8.17304900  |
| C                                                                                                    | 0.31898900  | 1.31314000  | 3.87836500  | C | -1.83792900 | -2.75573800 | 6.89701000  |
| C                                                                                                    | -2.04659500 | 0.03102300  | 1.48863300  | C | -3.02034100 | 1.39847700  | 8.25674100  |
| C                                                                                                    | -0.11826900 | -0.74820400 | 2.85243900  | C | -5.80000500 | -1.92711300 | 4.85243000  |
| C                                                                                                    | -2.83299600 | 2.27849800  | 2.16118900  | C | -4.75703000 | -2.94654200 | 4.79671600  |
| C                                                                                                    | -1.72881100 | 3.31021000  | 3.97120100  | C | -3.95014400 | -3.18634200 | 5.93134600  |
| C                                                                                                    | 0.58020600  | -0.11597700 | 3.95908900  | C | -6.26016800 | 0.24619400  | 5.95728700  |
| C                                                                                                    | 0.11678100  | 2.05555600  | 5.05679800  | C | -5.58104900 | 0.88101600  | 7.08077900  |
| C                                                                                                    | -3.09055700 | 1.04806500  | 1.53704700  | C | -2.60616000 | -0.91882000 | 8.37566300  |
| C                                                                                                    | -2.67441500 | -1.26348400 | 1.67065200  | C | -2.85411800 | -2.15382900 | 7.74859900  |
| C                                                                                                    | -0.71106000 | -2.01687300 | 3.00887500  | C | -3.64951700 | 0.09714700  | 8.42879900  |
| C                                                                                                    | -3.84787700 | 2.88369300  | 3.00892100  | C | -6.00080300 | -1.18694300 | 6.03036800  |
| C                                                                                                    | -3.16521100 | 3.51391300  | 4.13320900  | C | -4.15904700 | -2.41885500 | 7.14861900  |
| C                                                                                                    | -0.92148500 | 3.07178400  | 5.10827800  | C | -4.90929500 | -0.15943400 | 7.85061300  |
| C                                                                                                    | 0.62719100  | -0.76880400 | 5.20870100  | C | -5.16608900 | -1.43567600 | 7.20117000  |
| C                                                                                                    | 0.16572900  | 1.38466700  | 6.35440200  | C | -3.09055700 | 1.04806500  | -1.53704700 |
| C                                                                                                    | -4.36442900 | 0.37260900  | 1.73592700  | C | -2.04659500 | 0.03102300  | -1.48863300 |
| C                                                                                                    | -4.11171400 | -1.05940800 | 1.81052300  | C | -2.83299600 | 2.27849800  | -2.16118900 |
| C                                                                                                    | -2.01746100 | -2.29784600 | 2.38953800  | C | -4.36442900 | 0.37260900  | -1.73592700 |
| C                                                                                                    | -0.65505000 | -2.69359200 | 4.29221800  | C | -0.76247900 | 0.29306600  | -2.05162200 |
| C                                                                                                    | -5.08433300 | 2.23358100  | 3.20641500  | C | -2.67441500 | -1.26348400 | -1.67065200 |
|                                                                                                      |             |             |             | C | -1.51903000 | 2.54853800  | -2.75627600 |

|   |             |             |             |   |             |             |             |
|---|-------------|-------------|-------------|---|-------------|-------------|-------------|
| C | -3.84787700 | 2.88369300  | -3.00892100 | C | -1.58600400 | 1.18968600  | -8.09877500 |
| C | -4.11171400 | -1.05940800 | -1.81052300 | C | -3.02034100 | 1.39847700  | -8.25674100 |
| C | -5.34755100 | 0.95722900  | -2.55751900 | C | -5.16608900 | -1.43567600 | -7.20117000 |
| C | -0.50712900 | 1.56744800  | -2.70375600 | C | -4.15904700 | -2.41885500 | -7.14861900 |
| C | -0.11826900 | -0.74820400 | -2.85243900 | C | -4.90929500 | -0.15943400 | -7.85061300 |
| C | -2.01746100 | -2.29784600 | -2.38953800 | C | -1.32913300 | -0.24393000 | -8.17304900 |
| C | -1.72881100 | 3.31021000  | -3.97120100 | C | -2.85411800 | -2.15382900 | -7.74859900 |
| C | -3.16521100 | 3.51391300  | -4.13320900 | C | -3.64951700 | 0.09714700  | -8.42879900 |
| C | -5.08433300 | 2.23358100  | -3.20641500 | C | -2.60616000 | -0.91882000 | -8.37566300 |
| C | -4.83466800 | -1.86308600 | -2.70855300 | C | 4.13727700  | -3.06349400 | -0.72807800 |
| C | -6.10199900 | 0.12411600  | -3.48590500 | C | 3.13396800  | -2.10846900 | -1.18198300 |
| C | 0.31898900  | 1.31314000  | -3.87836500 | C | 5.35049900  | -3.19635600 | -1.43539600 |
| C | 0.58020600  | -0.11597700 | -3.95908900 | C | 4.13727700  | -3.06349400 | 0.72807800  |
| C | -0.71106000 | -2.01687300 | -3.00887500 | C | 3.38521300  | -1.31313100 | -2.31584700 |
| C | -2.77316900 | -3.12109000 | -3.31659200 | C | 2.48313200  | -1.53419300 | 0.00000000  |
| C | -0.92148500 | 3.07178400  | -5.10827800 | C | 5.60253700  | -2.38190500 | -2.61358000 |
| C | -3.74367000 | 3.47635700  | -5.41367000 | C | 6.60451000  | -3.33349900 | -0.70318700 |
| C | -5.68130700 | 2.19471800  | -4.53439500 | C | 3.13396800  | -2.10846900 | 1.18198300  |
| C | -5.85487900 | -1.26050600 | -3.55722200 | C | 5.35049900  | -3.19635600 | 1.43539600  |
| C | -4.16188100 | -2.91123700 | -3.47420400 | C | 4.63126100  | -1.45273400 | -3.04594800 |
| C | -6.31133700 | 0.89129500  | -4.70796500 | C | 3.01319300  | 0.10406600  | -2.31738200 |
| C | 0.11678100  | 2.05555600  | -5.05679800 | C | 2.14820100  | -0.13895900 | 0.00000000  |
| C | 0.62719100  | -0.76880400 | -5.20870100 | C | 7.01064900  | -2.00967100 | -2.61227100 |
| C | -0.65505000 | -2.69359200 | -4.29221800 | C | 7.63271100  | -2.60004100 | -1.43278800 |
| C | -1.93542000 | -3.35883000 | -4.48970700 | C | 6.60451000  | -3.33349900 | 0.70318700  |
| C | -1.52381500 | 3.02949100  | -6.43132300 | C | 3.38521300  | -1.31313100 | 2.31584700  |
| C | -5.02244500 | 2.80587500  | -5.61869000 | C | 5.60253700  | -2.38190500 | 2.61358000  |
| C | -2.90950400 | 3.22961900  | -6.58597700 | C | 5.03858200  | -0.12455300 | -3.49329500 |
| C | -5.80000500 | -1.92711300 | -4.85243000 | C | 4.03521700  | 0.83622200  | -3.04711200 |
| C | -4.75703000 | -2.94654200 | -4.79671600 | C | 2.41884200  | 0.67631600  | -1.17699200 |
| C | -6.26016800 | 0.24619400  | -5.95728700 | C | 2.41884200  | 0.67631600  | 1.17699200  |
| C | 0.16572900  | 1.38466700  | -6.35440200 | C | 7.40359400  | -0.72880200 | -3.04497300 |
| C | 0.41604900  | 0.00233300  | -6.42882700 | C | 8.62269200  | -1.89121200 | -0.72928700 |
| C | 0.00144300  | -2.06991200 | -5.37902400 | C | 7.63271100  | -2.60004100 | 1.43278800  |
| C | -2.51751900 | -3.39079600 | -5.77143700 | C | 4.63126100  | -1.45273400 | 3.04594800  |
| C | -0.85149500 | 1.98888200  | -7.20378700 | C | 3.01319300  | 0.10406600  | 2.31738200  |
| C | -4.97291300 | 2.13837100  | -6.91309600 | C | 7.01064900  | -2.00967100 | 2.61227100  |
| C | -3.66860300 | 2.40394800  | -7.51202000 | C | 6.39840400  | 0.23092800  | -3.49330100 |
| C | -6.00080300 | -1.18694300 | -6.03036800 | C | 4.42911600  | 2.11917900  | -2.61493000 |
| C | -3.95014400 | -3.18634200 | -5.93134600 | C | 2.81900100  | 2.00279100  | -0.72816300 |
| C | -5.58104900 | 0.88101600  | -7.08077900 | C | 2.81900100  | 2.00279100  | 0.72816300  |
| C | -0.34593400 | -0.82703400 | -7.35493600 | C | 8.42837900  | 0.00469500  | -2.31717200 |
| C | -0.60358100 | -2.10692300 | -6.70303400 | C | 8.62269200  | -1.89121200 | 0.72928700  |
| C | -1.83792900 | -2.75573800 | -6.89701000 | C | 9.02926300  | -0.56477600 | -1.17839300 |

|                                                                                                             |             |             |             |   |             |            |             |
|-------------------------------------------------------------------------------------------------------------|-------------|-------------|-------------|---|-------------|------------|-------------|
| C                                                                                                           | 5.03858200  | -0.12455300 | 3.49329500  | C | 1.00075800  | 5.71937300 | 2.84388100  |
| C                                                                                                           | 4.03521700  | 0.83622200  | 3.04711200  | C | -0.33276300 | 5.32295100 | -1.05467200 |
| C                                                                                                           | 7.40359400  | -0.72880200 | 3.04497300  | C | 0.14105100  | 6.76780900 | 0.90871000  |
| C                                                                                                           | 6.80667800  | 1.55754600  | -3.04733700 | C | 4.15346900  | 1.60157300 | 0.97858700  |
| C                                                                                                           | 5.83757400  | 2.48491300  | -2.61440300 | C | 3.98318900  | 1.45601200 | -0.46459000 |
| C                                                                                                           | 3.80914400  | 2.71089200  | -1.43495300 | C | 2.03823500  | 2.04280500 | -1.91439100 |
| C                                                                                                           | 3.80914400  | 2.71089200  | 1.43495300  | C | 0.94064400  | 3.96830800 | -2.71793800 |
| C                                                                                                           | 8.05858200  | 1.41718100  | -2.31689000 | C | 4.93870700  | 3.28798400 | 2.62020600  |
| C                                                                                                           | 9.02926300  | -0.56477600 | 1.17839300  | C | 3.80903100  | 5.80175300 | 3.39551700  |
| C                                                                                                           | 9.28172300  | 0.25358200  | 0.00000000  | C | 1.74801600  | 6.94996800 | 2.62837300  |
| C                                                                                                           | 6.39840400  | 0.23092800  | 3.49330100  | C | -0.02491600 | 6.62219000 | -0.48784900 |
| C                                                                                                           | 4.42911600  | 2.11917900  | 2.61493000  | C | 0.38838300  | 5.19970700 | -2.32432800 |
| C                                                                                                           | 8.42837900  | 0.00469500  | 2.31717200  | C | 1.21678400  | 7.59534100 | 1.43053000  |
| C                                                                                                           | 6.09124900  | 3.30205000  | -1.43354500 | C | 5.19184800  | 2.40685500 | 1.48323000  |
| C                                                                                                           | 4.83595500  | 3.44271200  | -0.70385900 | C | 4.85512800  | 2.11890500 | -1.35006200 |
| C                                                                                                           | 4.83595500  | 3.44271200  | 0.70385900  | C | 2.94362800  | 2.73018300 | -2.83214100 |
| C                                                                                                           | 8.30413200  | 2.20694100  | -1.17841200 | C | 2.26239100  | 3.91888400 | -3.32544400 |
| C                                                                                                           | 8.92475700  | 1.61666200  | 0.00000000  | C | 5.68656800  | 4.51851300 | 2.40369000  |
| C                                                                                                           | 6.80667800  | 1.55754600  | 3.04733700  | C | 3.12819000  | 6.99180500 | 2.89786000  |
| C                                                                                                           | 5.83757400  | 2.48491300  | 2.61440300  | C | 5.13206600  | 5.75401800 | 2.78388000  |
| C                                                                                                           | 8.05858200  | 1.41718100  | 2.31689000  | C | 0.88337000  | 7.30739500 | -1.40120600 |
| C                                                                                                           | 7.30060000  | 3.16624500  | -0.72910600 | C | 1.13326300  | 6.43069000 | -2.54027600 |
| C                                                                                                           | 6.09124900  | 3.30205000  | 1.43354500  | C | 2.09216700  | 8.25792400 | 0.54766700  |
| C                                                                                                           | 8.30413200  | 2.20694100  | 1.17841200  | C | 6.09644000  | 3.08992600 | 0.57006300  |
| C                                                                                                           | 7.30060000  | 3.16624500  | 0.72910600  | C | 5.92436300  | 2.94773200 | -0.82630800 |
|                                                                                                             |             |             |             | C | 4.32005700  | 2.77147000 | -2.54918800 |
|                                                                                                             |             |             |             | C | 2.98716600  | 5.11094600 | -3.53160400 |
|                                                                                                             |             |             |             | C | 6.39939500  | 4.39513600 | 1.13471500  |
|                                                                                                             |             |             |             | C | 4.03206400  | 7.67997300 | 1.98476900  |
|                                                                                                             |             |             |             | C | 5.26841200  | 6.91630400 | 1.91429300  |
|                                                                                                             |             |             |             | C | 1.91980000  | 8.11016700 | -0.89445700 |
|                                                                                                             |             |             |             | C | 2.41183200  | 6.38711800 | -3.13137800 |
|                                                                                                             |             |             |             | C | 3.51882200  | 8.30237000 | 0.82808700  |
|                                                                                                             |             |             |             | C | 6.05645700  | 4.11195400 | -1.69562400 |
|                                                                                                             |             |             |             | C | 5.06898200  | 3.99919600 | -2.76418000 |
|                                                                                                             |             |             |             | C | 4.41404700  | 5.15094300 | -3.24609000 |
|                                                                                                             |             |             |             | C | 6.52757900  | 5.51846100 | 0.29468900  |
|                                                                                                             |             |             |             | C | 5.95517800  | 6.79616600 | 0.68903700  |
|                                                                                                             |             |             |             | C | 3.24258700  | 8.06619100 | -1.50615600 |
|                                                                                                             |             |             |             | C | 3.48521200  | 7.22058200 | -2.60429400 |
|                                                                                                             |             |             |             | C | 4.23022100  | 8.17937200 | -0.43915800 |
|                                                                                                             |             |             |             | C | 6.35307800  | 5.37170000 | -1.14697700 |
|                                                                                                             |             |             |             | C | 4.72396200  | 6.45558200 | -2.67536700 |
|                                                                                                             |             |             |             | C | 5.42449200  | 7.43997300 | -0.50731900 |
| (4) Sr(C <sub>60</sub> ) <sub>3</sub> η <sup>6</sup> η <sup>6</sup> η <sup>6</sup> (quasi-C <sub>3v</sub> ) |             |             |             |   |             |            |             |
| PBE-D3(BJ)/def2-SVP, Singlet.                                                                               |             |             |             |   |             |            |             |
| Sr                                                                                                          | -0.00747500 | 0.00013200  | -1.13873500 |   |             |            |             |
| C                                                                                                           | 0.38583100  | 3.15849300  | 1.73501700  |   |             |            |             |
| C                                                                                                           | 0.65632900  | 2.29829500  | 0.59353100  |   |             |            |             |
| C                                                                                                           | 1.34837500  | 3.26422600  | 2.76137200  |   |             |            |             |
| C                                                                                                           | -0.28989300 | 4.34450500  | 1.23090100  |   |             |            |             |
| C                                                                                                           | 1.85580700  | 1.56121800  | 0.52451100  |   |             |            |             |
| C                                                                                                           | 0.10852900  | 2.92822500  | -0.60926900 |   |             |            |             |
| C                                                                                                           | 2.58677400  | 2.50076200  | 2.69000200  |   |             |            |             |
| C                                                                                                           | 1.65632800  | 4.57085800  | 3.32704200  |   |             |            |             |
| C                                                                                                           | -0.46287500 | 4.20127600  | -0.21206200 |   |             |            |             |
| C                                                                                                           | 0.00869700  | 5.60699000  | 1.77752100  |   |             |            |             |
| C                                                                                                           | 2.83695800  | 1.64755100  | 1.59578300  |   |             |            |             |
| C                                                                                                           | 2.56010600  | 1.41153200  | -0.74834300 |   |             |            |             |
| C                                                                                                           | 0.80746200  | 2.80593600  | -1.84250100 |   |             |            |             |
| C                                                                                                           | 3.66261900  | 3.33300500  | 3.21303100  |   |             |            |             |
| C                                                                                                           | 3.08735500  | 4.61383400  | 3.60691500  |   |             |            |             |

|   |             |             |             |   |             |             |             |
|---|-------------|-------------|-------------|---|-------------|-------------|-------------|
| C | 5.67624400  | 6.56338500  | -1.64456400 | C | 4.76047700  | -7.26125900 | 1.94034100  |
| C | 2.65351000  | -1.85360800 | 1.63365000  | C | 3.47902900  | -7.95020200 | 1.96874000  |
| C | 1.70649000  | -1.69483800 | 0.54041800  | C | 6.01253600  | -5.74554000 | -1.07147000 |
| C | 2.32540800  | -2.70372300 | 2.70981100  | C | 4.14463100  | -5.38356600 | -3.21498100 |
| C | 3.98585500  | -1.87911400 | 1.05023200  | C | 5.48418000  | -7.16664200 | 0.73412400  |
| C | 0.46483300  | -2.36166600 | 0.56844500  | C | 0.44599200  | -7.34810900 | -1.48840400 |
| C | 2.45179300  | -1.57281100 | -0.71273700 | C | 0.77663200  | -6.47382800 | -2.60853500 |
| C | 1.04288500  | -3.39344200 | 2.73916700  | C | 2.07033000  | -6.49975500 | -3.16717300 |
| C | 3.33610100  | -3.60507000 | 3.24770000  | C | 1.54561400  | -8.39371900 | 0.47616300  |
| C | 3.86206600  | -1.70509700 | -0.39417400 | C | 2.95989300  | -8.52647000 | 0.79141400  |
| C | 4.96160200  | -2.75057300 | 1.56957600  | C | 5.27935200  | -6.88831700 | -1.60238300 |
| C | 0.11474500  | -3.21823000 | 1.69125000  | C | 4.36172100  | -6.71139300 | -2.65490200 |
| C | -0.08993500 | -2.94060800 | -0.65570400 | C | 4.94729300  | -7.76249900 | -0.48384100 |
| C | 1.92380800  | -2.15847900 | -1.89868800 | C | 1.41994600  | -8.21710300 | -0.96732200 |
| C | 1.25802600  | -4.72303800 | 3.29491000  | C | 3.07846100  | -7.40196800 | -2.62517100 |
| C | 2.67623300  | -4.85412000 | 3.60960400  | C | 3.70980200  | -8.43002000 | -0.45583400 |
| C | 4.62751300  | -3.62901300 | 2.68762900  | C | 2.75816100  | -8.24521000 | -1.54498000 |
| C | 4.71631900  | -2.40684500 | -1.26687900 | C | -2.96246100 | -1.42538800 | 1.61238600  |
| C | 5.84825900  | -3.47389100 | 0.67014400  | C | -2.34196900 | -0.67540100 | 0.53066900  |
| C | -0.61757800 | -4.35487600 | 1.15421700  | C | -3.52745900 | -0.72594000 | 2.69883600  |
| C | -0.74571800 | -4.18298600 | -0.29058200 | C | -3.66399500 | -2.54870900 | 1.01036400  |
| C | 0.64717100  | -2.84512700 | -1.86981200 | C | -2.28052200 | 0.73184100  | 0.58194700  |
| C | 2.81008700  | -2.88589200 | -2.80346500 | C | -2.61580800 | -1.35841400 | -0.73328400 |
| C | 0.54812700  | -5.82414900 | 2.77976100  | C | -3.46514500 | 0.72832300  | 2.75161000  |
| C | 3.33183500  | -6.08009300 | 3.39941500  | C | -4.81881700 | -1.14296600 | 3.22903300  |
| C | 5.30755800  | -4.89866100 | 2.47373000  | C | -3.45007400 | -2.50800600 | -0.43357100 |
| C | 5.72052700  | -3.30471700 | -0.72823000 | C | -4.91265300 | -2.94997300 | 1.52196400  |
| C | 4.17426800  | -3.01120800 | -2.48809600 | C | -2.83997900 | 1.45218300  | 1.71470500  |
| C | 6.05847000  | -4.80198700 | 1.22414900  | C | -2.49753700 | 1.52411300  | -0.63029800 |
| C | -0.40753600 | -5.63955200 | 1.69032000  | C | -2.84880700 | -0.58739400 | -1.90820300 |
| C | -0.65960300 | -5.29996800 | -1.14485200 | C | -4.71836000 | 1.21407100  | 3.31369000  |
| C | 0.73449100  | -4.00286700 | -2.75642900 | C | -5.55582400 | 0.05691000  | 3.60950300  |
| C | 2.07212600  | -4.02511000 | -3.33031100 | C | -5.49817800 | -2.23201500 | 2.65082200  |
| C | 1.22621800  | -7.09480600 | 2.56634900  | C | -4.49043600 | -2.86864300 | -1.31193200 |
| C | 4.67043600  | -6.10361700 | 2.82155800  | C | -5.98765800 | -3.32681600 | 0.61569300  |
| C | 2.59438500  | -7.22082000 | 2.86834800  | C | -3.44279900 | 2.67077200  | 1.19613500  |
| C | 5.80474300  | -4.46383800 | -1.60950700 | C | -3.22986600 | 2.71637600  | -0.24767600 |
| C | 4.85417600  | -4.27917400 | -2.70121900 | C | -2.79098900 | 0.86078000  | -1.85429800 |
| C | 6.14142800  | -5.92033400 | 0.37210400  | C | -3.92743300 | -0.96295400 | -2.81977700 |
| C | -0.32255400 | -6.79479100 | 0.80954300  | C | -5.30206000 | 2.39482000  | 2.81583400  |
| C | -0.44433200 | -6.62252200 | -0.58878900 | C | -6.94423200 | 0.12345100  | 3.39881300  |
| C | 0.09947400  | -5.20393900 | -2.39524700 | C | -6.93731400 | -2.16362700 | 2.43664700  |
| C | 2.73019100  | -5.25532000 | -3.53516600 | C | -5.77606100 | -3.28181700 | -0.78126800 |
| C | 0.68850700  | -7.69210600 | 1.34623800  | C | -4.73282100 | -2.07566300 | -2.52089800 |

|   |             |             |             |   |           |          |           |
|---|-------------|-------------|-------------|---|-----------|----------|-----------|
| C | -7.23734700 | -2.83928900 | 1.17711200  | C | -3.352429 | 3.449779 | 3.253646  |
| C | -4.65440300 | 3.13835400  | 1.73859600  | C | -3.908397 | 1.555668 | -0.372573 |
| C | -4.23227600 | 3.22712300  | -1.09635400 | C | -4.984901 | 2.553756 | 1.617099  |
| C | -3.82868900 | 1.39091300  | -2.73542900 | C | -0.171764 | 3.168070 | 1.621149  |
| C | -4.52996200 | 0.26141800  | -3.32789200 | C | -0.019783 | 2.906311 | -0.724389 |
| C | -6.74027300 | 2.46400400  | 2.60093000  | C | -2.029479 | 2.071119 | -1.913118 |
| C | -7.64786900 | -1.00616700 | 2.80216900  | C | -1.311382 | 4.628178 | 3.253646  |
| C | -7.54808000 | 1.34828300  | 2.88645200  | C | -2.722256 | 4.715086 | 3.603806  |
| C | -6.81529400 | -2.74863900 | -1.65579600 | C | -4.650229 | 3.436592 | 2.729130  |
| C | -6.16974500 | -2.00936500 | -2.73519600 | C | -4.800068 | 2.230229 | -1.215503 |
| C | -8.24049700 | -2.32583900 | 0.33137800  | C | -5.911375 | 3.253806 | 0.744295  |
| C | -5.69073900 | 3.66964300  | 0.86443000  | C | 0.511561  | 4.325231 | 1.072501  |
| C | -5.47977100 | 3.70744000  | -0.53281900 | C | 0.606951  | 4.162605 | -0.372573 |
| C | -4.53698100 | 2.54450300  | -2.35658000 | C | -0.778903 | 2.793140 | -1.913118 |
| C | -5.92370900 | 0.32788500  | -3.53347800 | C | -2.957733 | 2.770092 | -2.792898 |
| C | -6.97865300 | 3.24995500  | 1.39311300  | C | -0.651061 | 5.745512 | 2.729130  |
| C | -8.68771800 | -0.47850400 | 1.92745100  | C | -3.414785 | 5.914582 | 3.415596  |
| C | -8.62651300 | 0.97424100  | 1.97996900  | C | -5.370704 | 4.684352 | 2.537094  |
| C | -8.02375300 | -2.28117300 | -1.11125100 | C | -5.815369 | 3.093537 | -0.649781 |
| C | -6.75643600 | -0.82737000 | -3.23175200 | C | -4.308657 | 2.852766 | -2.445802 |
| C | -8.97650900 | -1.13038900 | 0.71139900  | C | -6.148207 | 4.570124 | 1.308328  |
| C | -6.55824700 | 3.32865900  | -1.43939200 | C | 0.280833  | 5.593929 | 1.617099  |
| C | -5.97463100 | 2.61570400  | -2.57043000 | C | 0.468599  | 5.272095 | -1.215503 |
| C | -6.65661600 | 1.52527100  | -3.14679600 | C | -0.920104 | 3.946518 | -2.792898 |
| C | -8.02011700 | 2.88587700  | 0.51726200  | C | -2.269131 | 3.930250 | -3.331898 |
| C | -8.85657000 | 1.73344900  | 0.81417100  | C | -1.371416 | 6.993342 | 2.537094  |
| C | -8.63083000 | -1.05849100 | -1.62339100 | C | -4.765682 | 5.899846 | 2.872349  |
| C | -8.00931000 | -0.34443100 | -2.66465000 | C | -2.726576 | 7.077125 | 2.872349  |
| C | -9.21498500 | -0.34490600 | -0.49462400 | C | -5.957470 | 4.250450 | -1.522804 |
| C | -7.80343700 | 2.92706400  | -0.92554400 | C | -5.030713 | 4.098221 | -2.636467 |
| C | -7.94772400 | 1.11092700  | -2.61241500 | C | -6.285380 | 5.681937 | 0.467509  |
| C | -9.15599100 | 1.05929600  | -0.44415300 | C | 0.137809  | 6.746304 | 0.744295  |
| C | -8.51018000 | 1.79972900  | -1.52179400 | C | 0.228603  | 6.583026 | -0.649781 |

(5)  $\text{Sr}(\text{C}_{60})_3 \eta^6 \eta^6 \eta^6 (\text{C}_{3v})$  (for EDA-NOCV)

BP86-D3(BJ)/TZP, Singlet

|    |           |          |           |
|----|-----------|----------|-----------|
| Sr | 0.000000  | 0.000000 | -1.190176 |
| C  | -2.657747 | 1.732787 | 1.621149  |
| C  | -1.737352 | 1.609331 | 0.506673  |
| C  | -2.330511 | 2.583174 | 2.686998  |
| C  | -4.001541 | 1.719590 | 1.072501  |
| C  | -0.525046 | 2.309257 | 0.506673  |
| C  | -2.507047 | 1.470288 | -0.724389 |
| C  | -1.071839 | 3.309869 | 2.686998  |

|   |           |          |           |
|---|-----------|----------|-----------|
| C | -3.352429 | 3.449779 | 3.253646  |
| C | -3.908397 | 1.555668 | -0.372573 |
| C | -4.984901 | 2.553756 | 1.617099  |
| C | -0.171764 | 3.168070 | 1.621149  |
| C | -0.019783 | 2.906311 | -0.724389 |
| C | -2.029479 | 2.071119 | -1.913118 |
| C | -1.311382 | 4.628178 | 3.253646  |
| C | -2.722256 | 4.715086 | 3.603806  |
| C | -4.650229 | 3.436592 | 2.729130  |
| C | -4.800068 | 2.230229 | -1.215503 |
| C | -5.911375 | 3.253806 | 0.744295  |
| C | 0.511561  | 4.325231 | 1.072501  |
| C | 0.606951  | 4.162605 | -0.372573 |
| C | -0.778903 | 2.793140 | -1.913118 |
| C | -2.957733 | 2.770092 | -2.792898 |
| C | -0.651061 | 5.745512 | 2.729130  |
| C | -3.414785 | 5.914582 | 3.415596  |
| C | -5.370704 | 4.684352 | 2.537094  |
| C | -5.815369 | 3.093537 | -0.649781 |
| C | -4.308657 | 2.852766 | -2.445802 |
| C | -6.148207 | 4.570124 | 1.308328  |
| C | 0.280833  | 5.593929 | 1.617099  |
| C | 0.468599  | 5.272095 | -1.215503 |
| C | -0.920104 | 3.946518 | -2.792898 |
| C | -2.269131 | 3.930250 | -3.331898 |
| C | -1.371416 | 6.993342 | 2.537094  |
| C | -4.765682 | 5.899846 | 2.872349  |
| C | -2.726576 | 7.077125 | 2.872349  |
| C | -5.957470 | 4.250450 | -1.522804 |
| C | -5.030713 | 4.098221 | -2.636467 |
| C | -6.285380 | 5.681937 | 0.467509  |
| C | 0.137809  | 6.746304 | 0.744295  |
| C | 0.228603  | 6.583026 | -0.649781 |
| C | -0.316240 | 5.157789 | -2.445802 |
| C | -2.964374 | 5.134446 | -3.513958 |
| C | -0.883740 | 7.609566 | 1.308328  |
| C | -4.911189 | 7.054581 | 1.998404  |
| C | -3.653852 | 7.780505 | 1.998404  |
| C | -6.188683 | 5.516084 | -0.977123 |
| C | -4.370937 | 5.218952 | -3.158903 |
| C | -5.658971 | 6.944293 | 0.817539  |
| C | -0.702262 | 7.284546 | -1.522804 |
| C | -1.033807 | 6.405836 | -2.636467 |
| C | -2.334276 | 6.394819 | -3.158903 |

|   |           |           |           |   |           |           |           |
|---|-----------|-----------|-----------|---|-----------|-----------|-----------|
| C | -1.778011 | 8.284267  | 0.467509  | C | 6.659733  | 3.034096  | -1.522804 |
| C | -3.184448 | 8.372959  | 0.817539  | C | 6.064520  | 2.307615  | -2.636467 |
| C | -5.504088 | 6.680340  | -1.519940 | C | 8.063391  | 2.602330  | 0.467509  |
| C | -4.613162 | 6.535269  | -2.588858 | C | 5.773566  | -3.492498 | 0.744295  |
| C | -5.172362 | 7.560234  | -0.408813 | C | 5.586766  | -3.489489 | -0.649781 |
| C | -1.682727 | 8.117599  | -0.977123 | C | 4.624896  | -2.305023 | -2.445802 |
| C | -3.353128 | 7.262750  | -2.588858 | C | 5.928748  | 0.000000  | -3.513958 |
| C | -3.961174 | 8.259514  | -0.408813 | C | 7.031947  | -3.039442 | 1.308328  |
| C | -3.033301 | 8.106850  | -1.519940 | C | 8.565041  | 0.725924  | 1.998404  |
| C | 2.829511  | 1.435283  | 1.621149  | C | 8.565041  | -0.725924 | 1.998404  |
| C | 2.262398  | 0.699925  | 0.506673  | C | 7.871410  | 2.601515  | -0.977123 |
| C | 3.402350  | 0.726695  | 2.686998  | C | 6.705214  | 1.175867  | -3.158903 |
| C | 3.489979  | 2.605641  | 1.072501  | C | 8.843419  | 1.428666  | 0.817539  |
| C | 2.262398  | -0.699925 | 0.506673  | C | 6.659733  | -3.034096 | -1.522804 |
| C | 2.526830  | 1.436023  | -0.724389 | C | 6.064520  | -2.307615 | -2.636467 |
| C | 3.402350  | -0.726695 | 2.686998  | C | 6.705214  | -1.175867 | -3.158903 |
| C | 4.663811  | 1.178399  | 3.253646  | C | 8.063391  | -2.602330 | 0.467509  |
| C | 3.301446  | 2.606937  | -0.372573 | C | 8.843419  | -1.428666 | 0.817539  |
| C | 4.704068  | 3.040173  | 1.617099  | C | 8.537388  | 1.426510  | -1.519940 |
| C | 2.829511  | -1.435283 | 1.621149  | C | 7.966290  | 0.727481  | -2.588858 |
| C | 2.526830  | -1.436023 | -0.724389 | C | 9.133536  | 0.699280  | -0.408813 |
| C | 2.808381  | 0.722020  | -1.913118 | C | 7.871410  | -2.601515 | -0.977123 |
| C | 4.663811  | -1.178399 | 3.253646  | C | 7.966290  | -0.727481 | -2.588858 |
| C | 5.444512  | 0.000000  | 3.603806  | C | 9.133536  | -0.699280 | -0.408813 |
| C | 5.301290  | 2.308921  | 2.729130  | C | 8.537388  | -1.426510 | -1.519940 |
| C | 4.331469  | 3.041866  | -1.215503 | C | -0.171764 | -3.168070 | 1.621149  |
| C | 5.773566  | 3.492498  | 0.744295  | C | -0.525046 | -2.309257 | 0.506673  |
| C | 3.489979  | -2.605641 | 1.072501  | C | -1.071839 | -3.309869 | 2.686998  |
| C | 3.301446  | -2.606937 | -0.372573 | C | 0.511561  | -4.325231 | 1.072501  |
| C | 2.808381  | -0.722020 | -1.913118 | C | -1.737352 | -1.609331 | 0.506673  |
| C | 3.877836  | 1.176426  | -2.792898 | C | -0.019783 | -2.906311 | -0.724389 |
| C | 5.301290  | -2.308921 | 2.729130  | C | -2.330511 | -2.583174 | 2.686998  |
| C | 6.829570  | 0.000000  | 3.415596  | C | -1.311382 | -4.628178 | 3.253646  |
| C | 6.742119  | 2.308990  | 2.537094  | C | 0.606951  | -4.162605 | -0.372573 |
| C | 5.586766  | 3.489489  | -0.649781 | C | 0.280833  | -5.593929 | 1.617099  |
| C | 4.624896  | 2.305023  | -2.445802 | C | -2.657747 | -1.732787 | 1.621149  |
| C | 7.031947  | 3.039442  | 1.308328  | C | -2.507047 | -1.470288 | -0.724389 |
| C | 4.704068  | -3.040173 | 1.617099  | C | -0.778903 | -2.793140 | -1.913118 |
| C | 4.331469  | -3.041866 | -1.215503 | C | -3.352429 | -3.449779 | 3.253646  |
| C | 3.877836  | -1.176426 | -2.792898 | C | -2.722256 | -4.715086 | 3.603806  |
| C | 4.538262  | 0.000000  | -3.331898 | C | -0.651061 | -5.745512 | 2.729130  |
| C | 6.742119  | -2.308990 | 2.537094  | C | 0.468599  | -5.272095 | -1.215503 |
| C | 7.492257  | 1.177279  | 2.872349  | C | 0.137809  | -6.746304 | 0.744295  |
| C | 7.492257  | -1.177279 | 2.872349  | C | -4.001541 | -1.719590 | 1.072501  |

|   |           |           |           |    |             |             |            |
|---|-----------|-----------|-----------|----|-------------|-------------|------------|
| C | -3.908397 | -1.555668 | -0.372573 | Ba | -0.32937600 | -2.13295100 | 0.00000000 |
| C | -2.029479 | -2.071119 | -1.913118 | C  | -0.39383100 | 1.35552700  | 2.71474400 |
| C | -0.920104 | -3.946518 | -2.792898 | C  | -0.73461900 | 0.07652900  | 2.11349400 |
| C | -4.650229 | -3.436592 | 2.729130  | C  | -1.33332200 | 2.40717800  | 2.71668000 |
| C | -3.414785 | -5.914582 | 3.415596  | C  | 0.40435600  | 1.09400900  | 3.90729800 |
| C | -1.371416 | -6.993342 | 2.537094  | C  | -2.02722400 | -0.11836700 | 1.54359300 |
| C | 0.228603  | -6.583026 | -0.649781 | C  | -0.16833400 | -0.97232900 | 2.96274100 |
| C | -0.316240 | -5.157789 | -2.445802 | C  | -2.65754900 | 2.20527500  | 2.11985800 |
| C | -0.883740 | -7.609566 | 1.308328  | C  | -1.49689400 | 3.23381800  | 3.89607000 |
| C | -4.984901 | -2.553756 | 1.617099  | C  | 0.56411300  | -0.34490600 | 4.04966100 |
| C | -4.800068 | -2.230229 | -1.215503 | C  | 0.24731300  | 1.89823500  | 5.05148100 |
| C | -2.957733 | -2.770092 | -2.792898 | C  | -2.99655800 | 0.97179300  | 1.54148500 |
| C | -2.269131 | -3.930250 | -3.331898 | C  | -2.74722600 | -1.35653900 | 1.77264000 |
| C | -5.370704 | -4.684352 | 2.537094  | C  | -0.85487600 | -2.18587000 | 3.16824100 |
| C | -2.726576 | -7.077125 | 2.872349  | C  | -3.63306400 | 2.91744400  | 2.92987900 |
| C | -4.765682 | -5.899846 | 2.872349  | C  | -2.91615100 | 3.54587000  | 4.03426600 |
| C | -0.702262 | -7.284546 | -1.522804 | C  | -0.71729200 | 2.98605100  | 5.05015200 |
| C | -1.033807 | -6.405836 | -2.636467 | C  | 0.55464500  | -0.94607100 | 5.32650000 |
| C | -1.778011 | -8.284267 | 0.467509  | C  | 0.23831200  | 1.28049300  | 6.37633200 |
| C | -5.911375 | -3.253806 | 0.744295  | C  | -4.31755000 | 0.39752900  | 1.75509400 |
| C | -5.815369 | -3.093537 | -0.649781 | C  | -4.16727300 | -1.04483100 | 1.89215200 |
| C | -4.308657 | -2.852766 | -2.445802 | C  | -2.17245000 | -2.39929700 | 2.54834800 |
| C | -2.964374 | -5.134446 | -3.513958 | C  | -0.85592200 | -2.81065300 | 4.47864900 |
| C | -6.148207 | -4.570124 | 1.308328  | C  | -4.91356200 | 2.36528900  | 3.14129800 |
| C | -3.653852 | -7.780505 | 1.998404  | C  | -3.50468100 | 3.60296400  | 5.30956600 |
| C | -4.911189 | -7.054581 | 1.998404  | C  | -1.32934600 | 3.04370600  | 6.36799100 |
| C | -1.682727 | -8.117599 | -0.977123 | C  | 0.39006600  | -0.11142600 | 6.51141000 |
| C | -2.334276 | -6.394819 | -3.158903 | C  | -0.16419900 | -2.19017100 | 5.54494100 |
| C | -3.184448 | -8.372959 | 0.817539  | C  | -0.73887500 | 1.99087300  | 7.18967100 |
| C | -5.957470 | -4.250450 | -1.522804 | C  | -5.26235100 | 1.08453600  | 2.54263600 |
| C | -5.030713 | -4.098221 | -2.636467 | C  | -4.95232800 | -1.75585700 | 2.81650900 |
| C | -4.370937 | -5.218952 | -3.158903 | C  | -2.99084700 | -3.12845700 | 3.49932900 |
| C | -6.285380 | -5.681937 | 0.467509  | C  | -2.18093700 | -3.37615200 | 4.69003600 |
| C | -5.658971 | -6.944293 | 0.817539  | C  | -5.52090500 | 2.42414700  | 4.46387300 |
| C | -3.033301 | -8.106850 | -1.519940 | C  | -2.69866200 | 3.34771100  | 6.49980900 |
| C | -3.353128 | -7.262750 | -2.588858 | C  | -4.82883300 | 3.03287900  | 5.52864500 |
| C | -3.961174 | -8.259514 | -0.408813 | C  | -0.43472300 | -0.84534200 | 7.46396500 |
| C | -6.188683 | -5.516084 | -0.977123 | C  | -0.77875800 | -2.13004400 | 6.86345300 |
| C | -4.613162 | -6.535269 | -2.588858 | C  | -1.53496100 | 1.28362500  | 8.10903400 |
| C | -5.172362 | -7.560234 | -0.408813 | C  | -6.08003200 | 0.34699200  | 3.49765000 |
| C | -5.504088 | -6.680340 | -1.519940 | C  | -5.93250100 | -1.04710900 | 3.62923100 |
|   |           |           |           | C  | -4.36278200 | -2.81616300 | 3.63275600 |
|   |           |           |           | C  | -2.77258000 | -3.31419700 | 5.96586600 |
|   |           |           |           | C  | -6.24327100 | 1.17769900  | 4.68467800 |

(6) Ba(C<sub>60</sub>)<sub>3</sub> η<sup>2</sup>η<sup>6</sup>η<sup>6</sup> (C<sub>s</sub>)  
PBE-D3(BJ)/def2-SVP, Singlet



|   |             |             |             |   |             |             |             |
|---|-------------|-------------|-------------|---|-------------|-------------|-------------|
| C | -3.52111800 | 2.61614500  | 7.45084300  | C | -6.24327100 | 1.17769900  | -4.68467800 |
| C | -4.83633900 | 2.41836300  | 6.84995900  | C | 0.24731300  | 1.89823500  | -5.05148100 |
| C | -1.38028500 | -0.16022400 | 8.24713400  | C | 0.55464500  | -0.94607100 | -5.32650000 |
| C | -2.05772600 | -2.68118400 | 7.07106800  | C | -0.85592200 | -2.81065300 | -4.47864900 |
| C | -2.95160200 | 1.59946600  | 8.24287200  | C | -2.18093700 | -3.37615200 | -4.69003600 |
| C | -5.93590300 | -1.66132300 | 4.95165400  | C | -1.32934600 | 3.04370600  | -6.36799100 |
| C | -4.96768100 | -2.75314700 | 4.94947800  | C | -4.82883300 | 3.03287900  | -5.52864500 |
| C | -4.18836800 | -3.00182800 | 6.10169000  | C | -2.69866200 | 3.34771100  | -6.49980900 |
| C | -6.24737100 | 0.58331100  | 5.96021700  | C | -5.93590300 | -1.66132300 | -4.95165400 |
| C | -5.53339500 | 1.21538300  | 7.06310700  | C | -4.96768100 | -2.75314700 | -4.94947800 |
| C | -2.70412200 | -0.73386100 | 8.46312600  | C | -6.24737100 | 0.58331100  | -5.96021700 |
| C | -3.03498600 | -1.97295000 | 7.88490300  | C | 0.23831200  | 1.28049300  | -6.37633200 |
| C | -3.67288900 | 0.35483100  | 8.46379600  | C | 0.39006600  | -0.11142600 | -6.51141000 |
| C | -6.09177800 | -0.85972100 | 6.09579100  | C | -0.16419900 | -2.19017100 | -5.54494100 |
| C | -4.35113300 | -2.17054600 | 7.28340200  | C | -2.77258000 | -3.31419700 | -5.96586600 |
| C | -4.94365300 | 0.16369800  | 7.88365000  | C | -0.73887500 | 1.99087300  | -7.18967100 |
| C | -5.28623800 | -1.11737700 | 7.28514500  | C | -4.83633900 | 2.41836300  | -6.84995900 |
| C | -2.99655800 | 0.97179300  | -1.54148500 | C | -3.52111800 | 2.61614500  | -7.45084300 |
| C | -2.02722400 | -0.11836700 | -1.54359300 | C | -6.09177800 | -0.85972100 | -6.09579100 |
| C | -2.65754900 | 2.20527500  | -2.11985800 | C | -4.18836800 | -3.00182800 | -6.10169000 |
| C | -4.31755000 | 0.39752900  | -1.75509400 | C | -5.53339500 | 1.21538300  | -7.06310700 |
| C | -0.73461900 | 0.07652900  | -2.11349400 | C | -0.43472300 | -0.84534200 | -7.46396500 |
| C | -2.74722600 | -1.35653900 | -1.77264000 | C | -0.77875800 | -2.13004400 | -6.86345300 |
| C | -1.33332200 | 2.40717800  | -2.71668000 | C | -2.05772600 | -2.68118400 | -7.07106800 |
| C | -3.63306400 | 2.91744400  | -2.92987900 | C | -1.53496100 | 1.28362500  | -8.10903400 |
| C | -4.16727300 | -1.04483100 | -1.89215200 | C | -2.95160200 | 1.59946600  | -8.24287200 |
| C | -5.26235100 | 1.08453600  | -2.54263600 | C | -5.28623800 | -1.11737700 | -7.28514500 |
| C | -0.39383100 | 1.35552700  | -2.71474400 | C | -4.35113300 | -2.17054600 | -7.28340200 |
| C | -0.16833400 | -0.97232900 | -2.96274100 | C | -4.94365300 | 0.16369800  | -7.88365000 |
| C | -2.17245000 | -2.39929700 | -2.54834800 | C | -1.38028500 | -0.16022400 | -8.24713400 |
| C | -1.49689400 | 3.23381800  | -3.89607000 | C | -3.03498600 | -1.97295000 | -7.88490300 |
| C | -2.91615100 | 3.54587000  | -4.03426600 | C | -3.67288900 | 0.35483100  | -8.46379600 |
| C | -4.91356200 | 2.36528900  | -3.14129800 | C | -2.70412200 | -0.73386100 | -8.46312600 |
| C | -4.95232800 | -1.75585700 | -2.81650900 | C | 4.47273000  | -3.15866700 | -0.72807900 |
| C | -6.08003200 | 0.34699200  | -3.49765000 | C | 3.38031800  | -2.30601700 | -1.18171000 |
| C | 0.40435600  | 1.09400900  | -3.90729800 | C | 5.69253600  | -3.17277400 | -1.43594500 |
| C | 0.56411300  | -0.34490600 | -4.04966100 | C | 4.47273000  | -3.15866700 | 0.72807900  |
| C | -0.85487600 | -2.18587000 | -3.16824100 | C | 3.55036900  | -1.49063200 | -2.31772600 |
| C | -2.99084700 | -3.12845700 | -3.49932900 | C | 2.68471800  | -1.79396200 | 0.00000000  |
| C | -0.71729200 | 2.98605100  | -5.05015200 | C | 5.86320300  | -2.33682700 | -2.61450300 |
| C | -3.50468100 | 3.60296400  | -5.30956600 | C | 6.95366600  | -3.18582100 | -0.70331700 |
| C | -5.52090500 | 2.42414700  | -4.46387300 | C | 3.38031800  | -2.30601700 | 1.18171000  |
| C | -5.93250100 | -1.04710900 | -3.62923100 | C | 5.69253600  | -3.17277400 | 1.43594500  |
| C | -4.36278200 | -2.81616300 | -3.63275600 | C | 4.80587100  | -1.50661700 | -3.04625800 |

|   |            |             |             |                                                                                                             |             |             |             |
|---|------------|-------------|-------------|-------------------------------------------------------------------------------------------------------------|-------------|-------------|-------------|
| C | 3.04234500 | -0.11619200 | -2.31965300 | C                                                                                                           | 7.93640200  | 1.68443000  | 2.31711100  |
| C | 2.21392600 | -0.44242900 | 0.00000000  | C                                                                                                           | 7.00998900  | 3.34983800  | -0.72897400 |
| C | 7.22857300 | -1.82956000 | -2.61362300 | C                                                                                                           | 5.79344200  | 3.36793800  | 1.43433100  |
| C | 7.90496000 | -2.35580100 | -1.43303200 | C                                                                                                           | 8.10310700  | 2.49415200  | 1.17827100  |
| C | 6.95366600 | -3.18582100 | 0.70331700  | C                                                                                                           | 7.00998900  | 3.34983800  | 0.72897400  |
| C | 3.55036900 | -1.49063200 | 2.31772600  |                                                                                                             |             |             |             |
| C | 5.86320300 | -2.33682700 | 2.61450300  | (7) Ba(C <sub>60</sub> ) <sub>3</sub> η <sup>6</sup> η <sup>6</sup> η <sup>6</sup> (quasi-C <sub>3v</sub> ) |             |             |             |
| C | 5.08096500 | -0.14547000 | -3.49391100 | PBE-D3(BJ)/def2-SVP, Singlet                                                                                |             |             |             |
| C | 3.98809800 | 0.71303600  | -3.04863300 | Ba                                                                                                          | 0.01442500  | -1.85958700 | 0.00000000  |
| C | 2.39808900 | 0.39499500  | -1.17772800 | C                                                                                                           | 2.85342300  | 1.14573200  | 1.56766300  |
| C | 2.39808900 | 0.39499500  | 1.17772800  | C                                                                                                           | 1.89196500  | 0.05284900  | 1.58346100  |
| C | 7.49419100 | -0.51590000 | -3.04519300 | C                                                                                                           | 2.53665600  | 2.35019500  | 2.22870200  |
| C | 8.81904100 | -1.55250500 | -0.72897100 | C                                                                                                           | 4.17673400  | 0.55733800  | 1.69349500  |
| C | 7.90496000 | -2.35580100 | 1.43303200  | C                                                                                                           | 0.64562000  | 0.20822600  | 2.22528200  |
| C | 4.80587100 | -1.50661700 | 3.04625800  | C                                                                                                           | 2.61766500  | -1.21244000 | 1.66647800  |
| C | 3.04234500 | -0.11619200 | 2.31965300  | C                                                                                                           | 1.25197400  | 2.51023700  | 2.89441500  |
| C | 7.22857300 | -1.82956000 | 2.61362300  | C                                                                                                           | 3.55148200  | 3.01566600  | 3.03534400  |
| C | 6.40002100 | 0.34125400  | -3.49310400 | C                                                                                                           | 4.03279700  | -0.89591200 | 1.75260100  |
| C | 4.25440400 | 2.02906800  | -2.61732300 | C                                                                                                           | 5.15600100  | 1.19873800  | 2.47578900  |
| C | 2.66684500 | 1.75425600  | -0.72781000 | C                                                                                                           | 0.30918300  | 1.46025600  | 2.88615200  |
| C | 2.66684500 | 1.75425600  | 0.72781000  | C                                                                                                           | 0.07180300  | -0.89722200 | 2.99550900  |
| C | 8.44215800 | 0.31456000  | -2.31710200 | C                                                                                                           | 2.06976900  | -2.28010000 | 2.43534500  |
| C | 8.81904100 | -1.55250500 | 0.72897100  | C                                                                                                           | 1.46950200  | 3.27211600  | 4.11668800  |
| C | 9.09525300 | -0.19301800 | -1.17827100 | C                                                                                                           | 2.89132300  | 3.58600400  | 4.20421300  |
| C | 5.08096500 | -0.14547000 | 3.49391100  | C                                                                                                           | 4.83468200  | 2.45041500  | 3.15803900  |
| C | 3.98809800 | 0.71303600  | 3.04863300  | C                                                                                                           | 4.86894800  | -1.65058400 | 2.59962800  |
| C | 7.49419100 | -0.51590000 | 3.04519300  | C                                                                                                           | 6.02320700  | 0.41795800  | 3.34406100  |
| C | 6.67619600 | 1.70094700  | -3.04683300 | C                                                                                                           | -0.43461500 | 1.12634900  | 4.09036000  |
| C | 5.62096700 | 2.52977000  | -2.61556400 | C                                                                                                           | -0.58487400 | -0.32513400 | 4.15601600  |
| C | 3.58060100 | 2.55667200  | -1.43571200 | C                                                                                                           | 0.79148400  | -2.11937300 | 3.10337700  |
| C | 3.58060100 | 2.55667200  | 1.43571200  | C                                                                                                           | 2.93950300  | -3.06407500 | 3.30775200  |
| C | 7.93640200 | 1.68443000  | -2.31711100 | C                                                                                                           | 0.74690100  | 2.95508700  | 5.28236900  |
| C | 9.09525300 | -0.19301800 | 1.17827100  | C                                                                                                           | 3.53764400  | 3.57111700  | 5.45248600  |
| C | 9.26756300 | 0.64592600  | 0.00000000  | C                                                                                                           | 5.50411000  | 2.43693700  | 4.45111900  |
| C | 6.40002100 | 0.34125400  | 3.49310400  | C                                                                                                           | 5.87810200  | -0.98749100 | 3.40403500  |
| C | 4.25440400 | 2.02906800  | 2.61732300  | C                                                                                                           | 4.30771000  | -2.74966100 | 3.39079900  |
| C | 8.44215800 | 0.31456000  | 2.31710200  | C                                                                                                           | 6.23701000  | 1.17914400  | 4.56494700  |
| C | 5.79344200 | 3.36793800  | -1.43433100 | C                                                                                                           | -0.22372400 | 1.86268200  | 5.27154400  |
| C | 4.53100800 | 3.38444300  | -0.70406400 | C                                                                                                           | -0.51457200 | -0.98685900 | 5.39882200  |
| C | 4.53100800 | 3.38444300  | 0.70406400  | C                                                                                                           | 0.85976000  | -2.80728700 | 4.39005900  |
| C | 8.10310700 | 2.49415200  | -1.17827100 | C                                                                                                           | 2.18951600  | -3.38782100 | 4.51441900  |
| C | 8.77937000 | 1.96803600  | 0.00000000  | C                                                                                                           | 1.41609500  | 2.94277400  | 6.57487400  |
| C | 6.67619600 | 1.70094700  | 3.04683300  | C                                                                                                           | 4.86815700  | 2.98700900  | 5.57890200  |
| C | 5.62096700 | 2.52977000  | 2.61556400  | C                                                                                                           | 2.78799200  | 3.24413000  | 6.66008600  |

|   |             |             |             |   |             |             |             |
|---|-------------|-------------|-------------|---|-------------|-------------|-------------|
| C | 5.94444100  | -1.66833100 | 4.69158200  | C | -3.38921800 | -0.55463700 | -2.61678700 |
| C | 4.97885600  | -2.76263600 | 4.68095800  | C | -3.04945100 | -2.14457500 | -0.72573200 |
| C | 6.30404500  | 0.51987400  | 5.80804000  | C | -4.20534900 | -2.91474900 | 1.17843800  |
| C | -0.15592800 | 1.18094700  | 6.55481500  | C | -5.08509600 | 2.73591900  | -2.31628800 |
| C | -0.29776100 | -0.22504100 | 6.61397500  | C | -6.54420500 | 3.57190400  | 0.00000000  |
| C | 0.22664700  | -2.24463700 | 5.51243800  | C | -6.54026700 | 2.68591900  | 2.31655700  |
| C | 2.83815400  | -3.39602700 | 5.76533200  | C | -5.70178500 | -0.60938200 | 3.50065100  |
| C | 0.85912500  | 1.84300100  | 7.35881900  | C | -4.91965000 | -2.49268000 | 2.31325500  |
| C | 4.93956700  | 2.30384700  | 6.86478000  | C | -6.94965100 | 1.49007200  | 3.04891900  |
| C | 3.65639900  | 2.46364100  | 7.53231300  | C | -4.59889500 | 1.56875600  | -3.04771700 |
| C | 6.15446500  | -0.93122300 | 5.87010100  | C | -4.50553600 | -1.29667500 | -3.05196800 |
| C | 4.25654700  | -3.07760200 | 5.84949400  | C | -4.20534900 | -2.91474900 | -1.17843800 |
| C | 5.64755200  | 1.08975300  | 6.97473700  | C | -4.91723100 | -3.38829000 | 0.00000000  |
| C | 0.57467300  | -1.00539700 | 7.48353300  | C | -6.54026700 | 2.68591900  | -2.31655700 |
| C | 0.89287700  | -2.25839900 | 6.80603200  | C | -7.25866600 | 3.09530500  | 1.17862900  |
| C | 2.17833900  | -2.82157200 | 6.93007700  | C | -7.25866600 | 3.09530500  | -1.17862900 |
| C | 1.69981100  | 1.08905200  | 8.20015000  | C | -6.85683900 | -1.37405300 | 3.04386300  |
| C | 3.11746600  | 1.40236900  | 8.28861400  | C | -6.37339600 | -2.54295300 | 2.31623300  |
| C | 5.40853300  | -1.25793800 | 7.07875900  | C | -8.06559800 | 0.75028700  | 2.61020900  |
| C | 4.47610900  | -2.31290000 | 7.06977700  | C | -5.75097900 | 0.80381700  | -3.50256300 |
| C | 5.09024800  | -0.00779200 | 7.75800500  | C | -5.70178500 | -0.60938200 | -3.50065100 |
| C | 1.55299900  | -0.36286100 | 8.26222200  | C | -4.91965000 | -2.49268000 | -2.31325500 |
| C | 3.19092800  | -2.15380800 | 7.73794700  | C | -6.32653600 | -3.43381200 | 0.00000000  |
| C | 3.84898500  | 0.14624200  | 8.40165400  | C | -6.94965100 | 1.49007200  | -3.04891900 |
| C | 2.88240400  | -0.94571000 | 8.39143100  | C | -8.41486800 | 2.33023200  | 0.72743500  |
| C | -2.72129600 | 1.38739900  | 1.44066100  | C | -8.41486800 | 2.33023200  | -0.72743500 |
| C | -2.26020200 | 0.21927800  | 0.70511800  | C | -8.01588200 | -0.70861000 | 2.60872800  |
| C | -3.19237000 | 2.51018300  | 0.72775500  | C | -7.06586200 | -3.00317500 | 1.17810400  |
| C | -3.43704000 | 0.90507400  | 2.61217800  | C | -8.80897900 | 1.17574700  | 1.43463900  |
| C | -2.26020200 | 0.21927800  | -0.70511800 | C | -6.85683900 | -1.37405300 | -3.04386300 |
| C | -2.64890400 | -0.98206600 | 1.44373200  | C | -6.37339600 | -2.54295300 | -2.31623300 |
| C | -3.19237000 | 2.51018300  | -0.72775500 | C | -7.06586200 | -3.00317500 | -1.17810400 |
| C | -4.39466900 | 3.19785900  | 1.17984900  | C | -8.06559800 | 0.75028700  | -2.61020900 |
| C | -3.38921800 | -0.55463700 | 2.61678700  | C | -8.80897900 | 1.17574700  | -1.43463900 |
| C | -4.59889500 | 1.56875600  | 3.04771700  | C | -8.73318000 | -1.18479700 | 1.43183800  |
| C | -2.72129600 | 1.38739900  | -1.44066100 | C | -8.26730600 | -2.31148200 | 0.72864400  |
| C | -2.64890400 | -0.98206600 | -1.44373200 | C | -9.21724500 | -0.01835200 | 0.70328300  |
| C | -3.04945100 | -2.14457500 | 0.72573200  | C | -8.01588200 | -0.70861000 | -2.60872800 |
| C | -4.39466900 | 3.19785900  | -1.17984900 | C | -8.26730600 | -2.31148200 | -0.72864400 |
| C | -5.13913100 | 3.62332000  | 0.00000000  | C | -9.21724500 | -0.01835200 | -0.70328300 |
| C | -5.08509600 | 2.73591900  | 2.31628800  | C | -8.73318000 | -1.18479700 | -1.43183800 |
| C | -4.50553600 | -1.29667500 | 3.05196800  | C | 0.30918300  | 1.46025600  | -2.88615200 |
| C | -5.75097900 | 0.80381700  | 3.50256300  | C | 0.64562000  | 0.20822600  | -2.22528200 |
| C | -3.43704000 | 0.90507400  | -2.61217800 | C | 1.25197400  | 2.51023700  | -2.89441500 |

|   |             |             |             |
|---|-------------|-------------|-------------|
| C | -0.43461500 | 1.12634900  | -4.09036000 |
| C | 1.89196500  | 0.05284900  | -1.58346100 |
| C | 0.07180300  | -0.89722200 | -2.99550900 |
| C | 2.53665600  | 2.35019500  | -2.22870200 |
| C | 1.46950200  | 3.27211600  | -4.11668800 |
| C | -0.58487400 | -0.32513400 | -4.15601600 |
| C | -0.22372400 | 1.86268200  | -5.27154400 |
| C | 2.85342300  | 1.14573200  | -1.56766300 |
| C | 2.61766500  | -1.21244000 | -1.66647800 |
| C | 0.79148400  | -2.11937300 | -3.10337700 |
| C | 3.55148200  | 3.01566600  | -3.03534400 |
| C | 2.89132300  | 3.58600400  | -4.20421300 |
| C | 0.74690100  | 2.95508700  | -5.28236900 |
| C | -0.51457200 | -0.98685900 | -5.39882200 |
| C | -0.15592800 | 1.18094700  | -6.55481500 |
| C | 4.17673400  | 0.55733800  | -1.69349500 |
| C | 4.03279700  | -0.89591200 | -1.75260100 |
| C | 2.06976900  | -2.28010000 | -2.43534500 |
| C | 0.85976000  | -2.80728700 | -4.39005900 |
| C | 4.83468200  | 2.45041500  | -3.15803900 |
| C | 3.53764400  | 3.57111700  | -5.45248600 |
| C | 1.41609500  | 2.94277400  | -6.57487400 |
| C | -0.29776100 | -0.22504100 | -6.61397500 |
| C | 0.22664700  | -2.24463700 | -5.51243800 |
| C | 0.85912500  | 1.84300100  | -7.35881900 |
| C | 5.15600100  | 1.19873800  | -2.47578900 |
| C | 4.86894800  | -1.65058400 | -2.59962800 |
| C | 2.93950300  | -3.06407500 | -3.30775200 |
| C | 2.18951600  | -3.38782100 | -4.51441900 |
| C | 5.50411000  | 2.43693700  | -4.45111900 |
| C | 2.78799200  | 3.24413000  | -6.66008600 |
| C | 4.86815700  | 2.98700900  | -5.57890200 |
| C | 0.57467300  | -1.00539700 | -7.48353300 |
| C | 0.89287700  | -2.25839900 | -6.80603200 |
| C | 1.69981100  | 1.08905200  | -8.20015000 |
| C | 6.02320700  | 0.41795800  | -3.34406100 |
| C | 5.87810200  | -0.98749100 | -3.40403500 |
| C | 4.30771000  | -2.74966100 | -3.39079900 |
| C | 2.83815400  | -3.39602700 | -5.76533200 |
| C | 6.23701000  | 1.17914400  | -4.56494700 |
| C | 3.65639900  | 2.46364100  | -7.53231300 |
| C | 4.93956700  | 2.30384700  | -6.86478000 |
| C | 1.55299900  | -0.36286100 | -8.26222200 |
| C | 2.17833900  | -2.82157200 | -6.93007700 |

|   |            |             |             |
|---|------------|-------------|-------------|
| C | 3.11746600 | 1.40236900  | -8.28861400 |
| C | 5.94444100 | -1.66833100 | -4.69158200 |
| C | 4.97885600 | -2.76263600 | -4.68095800 |
| C | 4.25654700 | -3.07760200 | -5.84949400 |
| C | 6.30404500 | 0.51987400  | -5.80804000 |
| C | 5.64755200 | 1.08975300  | -6.97473700 |
| C | 2.88240400 | -0.94571000 | -8.39143100 |
| C | 3.19092800 | -2.15380800 | -7.73794700 |
| C | 3.84898500 | 0.14624200  | -8.40165400 |
| C | 6.15446500 | -0.93122300 | -5.87010100 |
| C | 4.47610900 | -2.31290000 | -7.06977700 |
| C | 5.09024800 | -0.00779200 | -7.75800500 |
| C | 5.40853300 | -1.25793800 | -7.07875900 |

(8) Ba(C<sub>60</sub>)<sub>3</sub> η<sup>6</sup>η<sup>6</sup> (C<sub>3v</sub>) (for EDA-NOCV)

BP86-D3(BJ)/TZP, Singlet

|    |           |          |           |
|----|-----------|----------|-----------|
| Ba | 0.000000  | 0.000000 | 1.817288  |
| C  | 2.572035  | 1.585419 | -1.349176 |
| C  | 1.718703  | 1.577023 | -0.175422 |
| C  | 2.180456  | 2.324055 | -2.475065 |
| C  | 3.944957  | 1.623746 | -0.881899 |
| C  | 0.506391  | 2.276952 | -0.175422 |
| C  | 2.558796  | 1.559023 | 1.015597  |
| C  | 0.922462  | 3.050358 | -2.475065 |
| C  | 3.165556  | 3.126363 | -3.183795 |
| C  | 3.937310  | 1.603433 | 0.576174  |
| C  | 4.893449  | 2.394614 | -1.563460 |
| C  | 0.086996  | 3.020157 | -1.349176 |
| C  | 0.070755  | 2.995494 | 1.015597  |
| C  | 2.149237  | 2.278069 | 2.163049  |
| C  | 1.124732  | 4.304633 | -3.183795 |
| C  | 2.512479  | 4.351742 | -3.622667 |
| C  | 4.492006  | 3.162277 | -2.737587 |
| C  | 4.874668  | 2.357838 | 1.292930  |
| C  | 5.867143  | 3.175457 | -0.820875 |
| C  | -0.566274 | 4.228306 | -0.881899 |
| C  | -0.580041 | 4.211527 | 0.576174  |
| C  | 0.898247  | 3.000329 | 2.163049  |
| C  | 3.124637  | 3.058532 | 2.912575  |
| C  | 0.492609  | 5.471330 | -2.737587 |
| C  | 3.211296  | 5.562128 | -3.596857 |
| C  | 5.218259  | 4.420459 | -2.713805 |
| C  | 5.853862  | 3.156381 | 0.585892  |
| C  | 4.453187  | 3.102362 | 2.480471  |

|   |           |           |           |   |           |           |           |
|---|-----------|-----------|-----------|---|-----------|-----------|-----------|
| C | 6.066029  | 4.428159  | -1.526899 | C | -2.629551 | -1.436471 | 1.015597  |
| C | -0.372928 | 5.435158  | -1.563460 | C | -3.047484 | 0.722259  | 2.163049  |
| C | -0.395386 | 5.400506  | 1.292930  | C | -4.290288 | -1.178270 | -3.183795 |
| C | 1.086448  | 4.235282  | 2.912575  | C | -5.024959 | 0.000000  | -3.622667 |
| C | 2.464728  | 4.269034  | 3.372757  | C | -4.984615 | 2.309053  | -2.737587 |
| C | 1.219101  | 6.729374  | -2.713805 | C | -4.479282 | 3.042667  | 1.292930  |
| C | 4.591197  | 5.598080  | -3.134037 | C | -5.683598 | 3.493366  | -0.820875 |
| C | 2.552481  | 6.775134  | -3.134037 | C | -3.378684 | -2.604560 | -0.881899 |
| C | 6.041958  | 4.394838  | 1.327693  | C | -3.357269 | -2.608094 | 0.576174  |
| C | 5.181177  | 4.358022  | 2.502742  | C | -3.047484 | -0.722259 | 2.163049  |
| C | 6.249028  | 5.618750  | -0.812227 | C | -4.211085 | 1.176749  | 2.912575  |
| C | -0.183545 | 6.668823  | -0.820875 | C | -4.984615 | -2.309053 | -2.737587 |
| C | -0.193425 | 6.647784  | 0.585892  | C | -6.422592 | 0.000000  | -3.596857 |
| C | 0.460131  | 5.407754  | 2.480471  | C | -6.437359 | 2.308915  | -2.713805 |
| C | 3.165482  | 5.482775  | 3.390175  | C | -5.660437 | 3.491403  | 0.585892  |
| C | 0.801883  | 7.467415  | -1.526899 | C | -4.913318 | 2.305392  | 2.480471  |
| C | 4.783941  | 6.834213  | -2.390822 | C | -6.867913 | 3.039256  | -1.526899 |
| C | 3.526631  | 7.560121  | -2.390822 | C | -4.520521 | -3.040544 | -1.563460 |
| C | 6.236558  | 5.599297  | 0.645694  | C | -4.479282 | -3.042667 | 1.292930  |
| C | 4.549199  | 5.527262  | 2.947101  | C | -4.211085 | -1.176749 | 2.912575  |
| C | 5.599562  | 6.841261  | -1.250463 | C | -4.929456 | 0.000000  | 3.372757  |
| C | 0.785063  | 7.429908  | 1.327693  | C | -6.437359 | -2.308915 | -2.713805 |
| C | 1.183569  | 6.666042  | 2.502742  | C | -7.143678 | 1.177054  | -3.134037 |
| C | 2.512150  | 6.703353  | 2.947101  | C | -7.143678 | -1.177054 | -3.134037 |
| C | 1.741466  | 8.221192  | -0.812227 | C | -6.827020 | 3.035070  | 1.327693  |
| C | 3.124925  | 8.269994  | -1.250463 | C | -6.364747 | 2.308020  | 2.502742  |
| C | 5.581322  | 6.813618  | 1.107282  | C | -7.990494 | 2.602442  | -0.812227 |
| C | 4.753770  | 6.779355  | 2.235454  | C | -5.683598 | -3.493366 | -0.820875 |
| C | 5.182403  | 7.577817  | -0.065828 | C | -5.660437 | -3.491403 | 0.585892  |
| C | 1.730854  | 8.200666  | 0.645694  | C | -4.913318 | -2.305392 | 2.480471  |
| C | 3.494209  | 7.506563  | 2.235454  | C | -6.330964 | 0.000000  | 3.390175  |
| C | 3.971381  | 8.277001  | -0.065828 | C | -6.867913 | -3.039256 | -1.526899 |
| C | 3.110105  | 8.240376  | 1.107282  | C | -8.310572 | 0.725909  | -2.390822 |
| C | -2.659031 | 1.434738  | -1.349176 | C | -8.310572 | -0.725909 | -2.390822 |
| C | -2.225093 | 0.699929  | -0.175422 | C | -7.967412 | 2.601369  | 0.645694  |
| C | -3.102918 | 0.726303  | -2.475065 | C | -7.061348 | 1.176091  | 2.947101  |
| C | -3.378684 | 2.604560  | -0.881899 | C | -8.724487 | 1.428732  | -1.250463 |
| C | -2.225093 | -0.699929 | -0.175422 | C | -6.827020 | -3.035070 | 1.327693  |
| C | -2.629551 | 1.436471  | 1.015597  | C | -6.364747 | -2.308020 | 2.502742  |
| C | -3.102918 | -0.726303 | -2.475065 | C | -7.061348 | -1.176091 | 2.947101  |
| C | -4.290288 | 1.178270  | -3.183795 | C | -7.990494 | -2.602442 | -0.812227 |
| C | -3.357269 | 2.608094  | 0.576174  | C | -8.724487 | -1.428732 | -1.250463 |
| C | -4.520521 | 3.040544  | -1.563460 | C | -8.691427 | 1.426758  | 1.107282  |
| C | -2.659031 | -1.434738 | -1.349176 | C | -8.247979 | 0.727208  | 2.235454  |

|   |           |           |           |   |          |           |           |
|---|-----------|-----------|-----------|---|----------|-----------|-----------|
| C | -9.153784 | 0.699184  | -0.065828 | C | 4.893449 | -2.394614 | -1.563460 |
| C | -7.967412 | -2.601369 | 0.645694  | C | 4.874668 | -2.357838 | 1.292930  |
| C | -8.247979 | -0.727208 | 2.235454  | C | 3.124637 | -3.058532 | 2.912575  |
| C | -9.153784 | -0.699184 | -0.065828 | C | 2.464728 | -4.269034 | 3.372757  |
| C | -8.691427 | -1.426758 | 1.107282  | C | 5.218259 | -4.420459 | -2.713805 |
| C | 0.086996  | -3.020157 | -1.349176 | C | 2.552481 | -6.775134 | -3.134037 |
| C | 0.506391  | -2.276952 | -0.175422 | C | 4.591197 | -5.598080 | -3.134037 |
| C | 0.922462  | -3.050358 | -2.475065 | C | 0.785063 | -7.429908 | 1.327693  |
| C | -0.566274 | -4.228306 | -0.881899 | C | 1.183569 | -6.666042 | 2.502742  |
| C | 1.718703  | -1.577023 | -0.175422 | C | 1.741466 | -8.221192 | -0.812227 |
| C | 0.070755  | -2.995494 | 1.015597  | C | 5.867143 | -3.175457 | -0.820875 |
| C | 2.180456  | -2.324055 | -2.475065 | C | 5.853862 | -3.156381 | 0.585892  |
| C | 1.124732  | -4.304633 | -3.183795 | C | 4.453187 | -3.102362 | 2.480471  |
| C | -0.580041 | -4.211527 | 0.576174  | C | 3.165482 | -5.482775 | 3.390175  |
| C | -0.372928 | -5.435158 | -1.563460 | C | 6.066029 | -4.428159 | -1.526899 |
| C | 2.572035  | -1.585419 | -1.349176 | C | 3.526631 | -7.560121 | -2.390822 |
| C | 2.558796  | -1.559023 | 1.015597  | C | 4.783941 | -6.834213 | -2.390822 |
| C | 0.898247  | -3.000329 | 2.163049  | C | 1.730854 | -8.200666 | 0.645694  |
| C | 3.165556  | -3.126363 | -3.183795 | C | 2.512150 | -6.703353 | 2.947101  |
| C | 2.512479  | -4.351742 | -3.622667 | C | 3.124925 | -8.269994 | -1.250463 |
| C | 0.492609  | -5.471330 | -2.737587 | C | 6.041958 | -4.394838 | 1.327693  |
| C | -0.395386 | -5.400506 | 1.292930  | C | 5.181177 | -4.358022 | 2.502742  |
| C | -0.183545 | -6.668823 | -0.820875 | C | 4.549199 | -5.527262 | 2.947101  |
| C | 3.944957  | -1.623746 | -0.881899 | C | 6.249028 | -5.618750 | -0.812227 |
| C | 3.937310  | -1.603433 | 0.576174  | C | 5.599562 | -6.841261 | -1.250463 |
| C | 2.149237  | -2.278069 | 2.163049  | C | 3.110105 | -8.240376 | 1.107282  |
| C | 1.086448  | -4.235282 | 2.912575  | C | 3.494209 | -7.506563 | 2.235454  |
| C | 4.492006  | -3.162277 | -2.737587 | C | 3.971381 | -8.277001 | -0.065828 |
| C | 3.211296  | -5.562128 | -3.596857 | C | 6.236558 | -5.599297 | 0.645694  |
| C | 1.219101  | -6.729374 | -2.713805 | C | 4.753770 | -6.779355 | 2.235454  |
| C | -0.193425 | -6.647784 | 0.585892  | C | 5.182403 | -7.577817 | -0.065828 |
| C | 0.460131  | -5.407754 | 2.480471  | C | 5.581322 | -6.813618 | 1.107282  |
| C | 0.801883  | -7.467415 | -1.526899 |   |          |           |           |

Geometric coordinates of the most stable configuration of  $M_2(C_{60})_3$ -HL (M = Ca, Sr, Ba) (VASP format)

|                                        |                     |                     |   |                    |                    |                    |
|----------------------------------------|---------------------|---------------------|---|--------------------|--------------------|--------------------|
| (1) $Ca_2(C_{60})_3$ -HL- $P\bar{3}m1$ |                     |                     |   | 0.6194463357184700 | 0.5017768091569398 | 0.4246930797243478 |
| PBE-D3(BJ)/PAW, 0 $\mu_B$              |                     |                     |   | 0.5415556490672102 | 0.4598389999558337 | 0.4052264175124345 |
| Lattice constants                      |                     |                     |   | 0.5795152393010320 | 0.6524063389593802 | 0.5949698327311697 |
| 19.7000007629000002                    | 0.0000000000000000  | 0.0000000000000000  | - | 0.3798831475821906 | 0.4968918138006359 | 0.6039729682984487 |
| 9.8500003814999992                     | 17.0607011152999988 | 0.0000000000000000  |   | 0.4991179873172650 | 0.6170325550651038 | 0.6043474372494432 |
| 0.0000000000000000                     | 0.0000000000000000  | 30.0000000000000000 |   | 0.3210164399750479 | 0.3696962763144394 | 0.4592580325393216 |
| Ca                                     | C                   |                     |   | 0.3779395247613664 | 0.3872656228385462 | 0.4238827680106150 |
| 2                                      | 180                 |                     |   | 0.2969264434241221 | 0.4359834742955886 | 0.5219867256105089 |
| Direct                                 |                     |                     |   | 0.6719754511367889 | 0.6813684364386492 | 0.5378073867935321 |
| 0.6665014785402609                     | 0.3326993979981424  | 0.4917952241706071  |   | 0.6808255763757567 | 0.6733408494352253 | 0.4918956405809082 |
| 0.3330153217688083                     | 0.6668406516932593  | 0.5365694645487228  |   | 0.6538374065549247 | 0.5819730606986361 | 0.4343814707355826 |
| 0.5074729731463450                     | 0.3468584437954988  | 0.5733534325337227  |   | 0.5009942786769160 | 0.4996383313814322 | 0.3957540768839299 |
| 0.5641502380288388                     | 0.3651300472453310  | 0.5380112193032268  |   | 0.6107809842843966 | 0.6955750924183944 | 0.5534640586256666 |
| 0.5235712130508601                     | 0.4013919740828562  | 0.6075061738130085  |   | 0.3735427441086053 | 0.5489206338977372 | 0.5722792490807264 |
| 0.4300374315100429                     | 0.3054659138111235  | 0.5533861621374532  |   | 0.4470124312967265 | 0.6230169765091409 | 0.5725315494254094 |
| 0.6354881396107024                     | 0.4369537675392250  | 0.5382262372306155  |   | 0.3059465867316831 | 0.4279409372140426 | 0.4745500243856438 |
| 0.5219254670372528                     | 0.3344667577858066  | 0.4964282419018058  |   | 0.4176661175751969 | 0.4627948591506625 | 0.4051466606105060 |
| 0.5973617670263240                     | 0.4757330963960584  | 0.6077273744749807  |   | 0.3330040524083936 | 0.5187425286406154 | 0.5318622909338170 |
| 0.4625171040272365                     | 0.4158577808487173  | 0.6232063218294895  |   | 0.6284108976461785 | 0.6793480049112839 | 0.4601472495769335 |
| 0.4389643246538922                     | 0.2973849192449833  | 0.5059485435860148  |   | 0.6120088322718381 | 0.6230736050082351 | 0.4245579052328541 |
| 0.3708917527622400                     | 0.3192854480243718  | 0.5685456950299990  |   | 0.5367893540242586 | 0.5827787221539030 | 0.4054993643756140 |
| 0.6525301998814448                     | 0.4929605418092266  | 0.5737775289881074  |   | 0.5603714693685774 | 0.7013066321140008 | 0.5227509072608147 |
| 0.6662642991465163                     | 0.4799371901282602  | 0.4968408873755659  |   | 0.4774144667873680 | 0.6642221693693499 | 0.5322822989302182 |
| 0.5523298552300234                     | 0.3756747133894583  | 0.4561721010054154  |   | 0.3467725484884008 | 0.5057176819726332 | 0.4549418280190399 |
| 0.5816469279419897                     | 0.5358714838625649  | 0.6235517786291109  |   | 0.4019773504998086 | 0.5229286501146179 | 0.4210213696125394 |
| 0.4983052888152086                     | 0.4990066519793201  | 0.6329370112341767  |   | 0.3637651614160428 | 0.5617314740098907 | 0.4904883168836089 |
| 0.3873106563351021                     | 0.3755778176352113  | 0.6041286723198949  |   | 0.5692861019961606 | 0.6931961641900763 | 0.4753196442710096 |
| 0.3885733898601754                     | 0.3030863621554795  | 0.4752269667722321  |   | 0.4757671239331939 | 0.5972658799262882 | 0.4212330822278447 |
| 0.3185152489487821                     | 0.3253245264397518  | 0.5367889215531984  |   | 0.4351221774936100 | 0.6336191740452118 | 0.4906910812212796 |
| 0.6933493354410255                     | 0.5707222356889228  | 0.5541562839913433  |   | 0.4918423935324136 | 0.6518170842572619 | 0.4553634408645692 |
| 0.7023371019959898                     | 0.5626626728336689  | 0.5067136191508426  |   | 0.8396024040728982 | 0.4929823279532186 | 0.5735903132649183 |
| 0.6257646400977245                     | 0.4497472731883481  | 0.4564125488345828  |   | 0.8009360229095860 | 0.4361224388404756 | 0.5383819808408957 |
| 0.5002162529404470                     | 0.3816466481307336  | 0.4243541026010864  |   | 0.8782096325187518 | 0.4770058528981167 | 0.6077100907677383 |
| 0.6213953858941562                     | 0.6113909400950920  | 0.6048100824357261  |   | 0.8756027801649109 | 0.5703054314999820 | 0.5534574320942232 |
| 0.4577666964632134                     | 0.5388159808495807  | 0.6234562279241886  |   | 0.8014048195598096 | 0.3647968337268397 | 0.5386703925061714 |
| 0.3455026563294371                     | 0.4166903940867092  | 0.5942837799039198  |   | 0.8123261556725323 | 0.4781287619723238 | 0.4967126574116465 |
| 0.3273994477528394                     | 0.3173280186669351  | 0.4908857505620057  |   | 0.8786273182457780 | 0.4031520910424419 | 0.6080260845805381 |
| 0.4198128356672089                     | 0.3462409133939839  | 0.4337093439977140  |   | 0.9538765828192558 | 0.5380695821937719 | 0.6231996562373963 |
| 0.3030615691456128                     | 0.3856275987952866  | 0.5525815383373150  |   | 0.8582746273589041 | 0.5611123430281165 | 0.5060490774386330 |
| 0.6783514753822101                     | 0.6290077373155949  | 0.5694419305365878  |   | 0.9487221005382744 | 0.6294480601673109 | 0.5684147938282631 |
| 0.6962761601425469                     | 0.6130376288859372  | 0.4761023092380886  |   | 0.8404255314799194 | 0.3477874930718436 | 0.5742070804895399 |

|                    |                    |                    |                    |                    |                    |
|--------------------|--------------------|--------------------|--------------------|--------------------|--------------------|
| 0.8131700753054606 | 0.3336516069182637 | 0.4973239659091531 | 0.1975000193827022 | 0.6356417466309000 | 0.4899665104203602 |
| 0.8227815830809163 | 0.4474017281377683 | 0.4564967652264580 | 0.1231068074829472 | 0.4300304074715462 | 0.4751665416345605 |
| 0.9545561451491807 | 0.4188371827823323 | 0.6237069357795002 | 0.1205051820387368 | 0.5233024897617383 | 0.4209544267430868 |
| 0.0012009972223964 | 0.5022356973161999 | 0.6329139217201617 | 0.1979047890723352 | 0.5642472981774255 | 0.4902604425727727 |
| 0.9887633413301923 | 0.6131512214912299 | 0.6039560910208850 | 0.1591443110134432 | 0.5073598493516203 | 0.4550566483692051 |
| 0.9142282066420633 | 0.6112762020139029 | 0.4751695426272458 | 0.6520299813238465 | 0.1596070796167514 | 0.5757181176970144 |
| 0.0069801087313539 | 0.6815960693260341 | 0.5365038416615303 | 0.6349057617460787 | 0.1986848853255211 | 0.5402516395366558 |
| 0.8771111886003214 | 0.3067334511345522 | 0.5545729901662914 | 0.5964781719872736 | 0.1207235656908419 | 0.6093491013842893 |
| 0.8597707279903527 | 0.2975148121570877 | 0.5071675138792120 | 0.6937843377985833 | 0.1236701892718740 | 0.5560717503697824 |
| 0.8231564930972545 | 0.373844808999869  | 0.4567833843817565 | 0.5632499325987631 | 0.1984368934069088 | 0.5398362817011992 |
| 0.8806565575430401 | 0.4992559184051482 | 0.4244984980195414 | 0.6666982152722080 | 0.1876708180330306 | 0.4989402784703839 |
| 0.9900932870965095 | 0.3788794919262060 | 0.6049521886177667 | 0.5222894465460630 | 0.1204384998258107 | 0.6089132190573722 |
| 0.0814876832349781 | 0.5426278582631274 | 0.6232482980551109 | 0.5812941317930711 | 0.0448314704862827 | 0.6248064109669362 |
| 0.0716083610572190 | 0.6547866118847439 | 0.5939323962727912 | 0.7033045311872383 | 0.1414947687299743 | 0.5087258247343233 |
| 0.9897805996639006 | 0.6724610291642437 | 0.4906276841687261 | 0.6792984173325471 | 0.0503652650548954 | 0.5710021688038891 |
| 0.9258003561741103 | 0.5796962477868165 | 0.4336942564706269 | 0.5061815648131112 | 0.1590640020634783 | 0.5748625645405884 |
| 0.0827926841913537 | 0.6970364848991764 | 0.5521551790023418 | 0.5214893088200439 | 0.1871385315253778 | 0.4980826629678340 |
| 0.9504714143597891 | 0.321713377662473  | 0.5697173109209718 | 0.6266707417637707 | 0.1776583879145046 | 0.4583144967071684 |
| 0.9159333678409656 | 0.3032796514845317 | 0.4764556500303455 | 0.4615108039691925 | 0.0443719454682475 | 0.6241056805998121 |
| 0.8813093360732223 | 0.3799147389061774 | 0.4249856166573590 | 0.4978626666012006 | 0.9975227892403044 | 0.6337507337344336 |
| 0.9172384546376836 | 0.4576845339080085 | 0.4053568275554705 | 0.6219334672595879 | 0.0100323191429308 | 0.6060479540879942 |
| 0.0729346150310397 | 0.4206206546201628 | 0.5949129230165250 | 0.6983310062725375 | 0.0858372327495414 | 0.4778850307210353 |
| 0.1174036015929419 | 0.6203841898289710 | 0.6036096919003020 | 0.6740191329997822 | 0.9924207193962418 | 0.5391359601651103 |
| 0.1181017817016900 | 0.5010564009678062 | 0.6041213720694482 | 0.4290076722318760 | 0.1226441582054884 | 0.5545111850986630 |
| 0.0482908115381028 | 0.6785592747619869 | 0.4589055535216476 | 0.4384864725779195 | 0.1404770780758383 | 0.5071643795200785 |
| 0.0086475043057207 | 0.6214141402523516 | 0.4236703255183012 | 0.5528038034183520 | 0.1773678425723412 | 0.4578825304477209 |
| 0.1390581039884861 | 0.7029051517829357 | 0.5214648513279954 | 0.6214403521090173 | 0.1200630904744215 | 0.4263598726134176 |
| 0.0089558316037397 | 0.3278080997486332 | 0.5379838780674274 | 0.3865720807050357 | 0.0091036469555315 | 0.6046542835340303 |
| 0.9917456095517155 | 0.3187110639455978 | 0.4920991699905350 | 0.4581212816138724 | 0.9173352122847401 | 0.6238386009518138 |
| 0.9270862458125848 | 0.3455044941305240 | 0.4346536351234958 | 0.5808852763708413 | 0.9272886129313871 | 0.5957472589239490 |
| 0.9975379034215081 | 0.4980788862486430 | 0.3956948482583795 | 0.6834276774557118 | 0.0101076822678453 | 0.4933131446295654 |
| 0.0844906234531443 | 0.389022537294860  | 0.5534335466901618 | 0.6563716513332807 | 0.0747570443127445 | 0.4359916644427789 |
| 0.1755343226545640 | 0.6264503388458117 | 0.5718132965087630 | 0.6130987140661418 | 0.9165023738660162 | 0.5542923169999691 |
| 0.1760045533801525 | 0.5529146123021546 | 0.5721410282819412 | 0.3701330589983109 | 0.0491641025913944 | 0.5691835697309513 |
| 0.1216781260050350 | 0.6936224471782367 | 0.4740615312124707 | 0.3889076812353278 | 0.0846354308508064 | 0.4760474805433950 |
| 0.0441940478595944 | 0.5814725738565494 | 0.4049186641672513 | 0.5015705637974316 | 0.1196104643229904 | 0.4256376424284311 |
| 0.1856562298817932 | 0.6667476234220686 | 0.5313125700627811 | 0.5438553628814289 | 0.0837833052605466 | 0.4064864700953851 |
| 0.0499843999999479 | 0.3708844869536814 | 0.4601923221369602 | 0.3456288287345869 | 0.9263737437060382 | 0.5943453136961238 |
| 0.0099314517412494 | 0.3871532972742127 | 0.4246442577010477 | 0.5004180878489463 | 0.8815048238435430 | 0.6046925673540861 |
| 0.0448474920118124 | 0.4622521886614960 | 0.4054112562814871 | 0.3805131562620251 | 0.8810246429588835 | 0.6039817749222143 |
| 0.1404626103961759 | 0.4391981406533041 | 0.5225631554284828 | 0.6318411690035537 | 0.9519581776205148 | 0.4611819919452395 |
| 0.1864584235806712 | 0.5221898734827173 | 0.5319177991260783 | 0.6154255878472209 | 0.9920199090387192 | 0.4257065263888517 |
| 0.1583671889990000 | 0.6525499904813428 | 0.4544444498527617 | 0.5635248515686825 | 0.8605927248492801 | 0.5232035842638323 |
| 0.1201006981493300 | 0.5971583479908531 | 0.4206457827917243 | 0.3185812551330114 | 0.9910452457442211 | 0.5370303797438681 |



|                    |                    |                    |                    |                    |                    |
|--------------------|--------------------|--------------------|--------------------|--------------------|--------------------|
| 0.3279981090609118 | 0.0087178769667756 | 0.4912014014532784 | 0.6637911533999300 | 0.4798202292816650 | 0.5005159181787650 |
| 0.4211126249498807 | 0.0738419099194088 | 0.4345891233740665 | 0.5523918777456306 | 0.3768407623038916 | 0.4597744707654211 |
| 0.5041278307660007 | 0.0035820382489620 | 0.3965627834297852 | 0.5777923673562764 | 0.5391947988858808 | 0.6244247625574443 |
| 0.3036764570666891 | 0.9153067605890292 | 0.5524586202400856 | 0.4959082671816573 | 0.5037937678363075 | 0.6329646824436748 |
| 0.4491995294119822 | 0.8237245720935887 | 0.5724810605793180 | 0.3874344717694978 | 0.3823002366690899 | 0.6044438667633478 |
| 0.3752695199848466 | 0.8233817744726040 | 0.5720535282487461 | 0.3915659474646536 | 0.3070450957818424 | 0.4770930751083245 |
| 0.5729922464126179 | 0.8784631141625325 | 0.4758601305613807 | 0.3217000438337687 | 0.3313364204128702 | 0.5368403471038282 |
| 0.5404878481339436 | 0.9567532147258488 | 0.4062481735925846 | 0.6891334843545091 | 0.5706095110754860 | 0.5565196824736371 |
| 0.4804985842154814 | 0.8139562484773100 | 0.5323030436802134 | 0.6993213262580729 | 0.5612442142278877 | 0.5094402879206191 |
| 0.3227217952866691 | 0.9507503059741285 | 0.4593476471125758 | 0.6247366056225322 | 0.4492019044125538 | 0.4599382079950136 |
| 0.3800698046874905 | 0.9910950065106550 | 0.4242944687632061 | 0.5024865196289230 | 0.3821847883393200 | 0.4268955106804675 |
| 0.4206974639149119 | 0.9562809241688537 | 0.4055282413619926 | 0.6176675362029983 | 0.6125925664850448 | 0.6049667223373724 |
| 0.2986278363983985 | 0.8595730092794184 | 0.5216343659410296 | 0.4568852159685008 | 0.5429003904491989 | 0.6219371758674683 |
| 0.3352558536283570 | 0.8133919010646136 | 0.5314348513415269 | 0.3471951371785114 | 0.4227265723706425 | 0.5929998765152678 |
| 0.4958140912834683 | 0.8420601871404695 | 0.4555188741141738 | 0.3315334179198419 | 0.3219820157149544 | 0.4912873288151142 |
| 0.4797322044657610 | 0.8807226634149171 | 0.4214836059235251 | 0.4235121292175254 | 0.3481221965993018 | 0.4353976651649702 |
| 0.4387558658031911 | 0.8026328438904737 | 0.4905452896635611 | 0.3065761629020849 | 0.3912012855565961 | 0.5511321616398942 |
| 0.3081845768480465 | 0.8774198702592968 | 0.4742967020822457 | 0.6743298813966295 | 0.6284063594096383 | 0.5703513375544372 |
| 0.4055284803873028 | 0.8804204424772993 | 0.4210388632698246 | 0.6942959898186399 | 0.6098221616582128 | 0.4777886450544420 |
| 0.3670179623179232 | 0.8023248419197319 | 0.4901093119971742 | 0.6197158753595648 | 0.4994218079593303 | 0.4271475463039974 |
| 0.3499562283572454 | 0.8414962329501253 | 0.4546566622112289 | 0.5439486281548932 | 0.4581419511168694 | 0.4069966222485559 |
|                    |                    |                    | 0.5773379384543855 | 0.6529298022544858 | 0.5935346451273295 |
|                    |                    |                    | 0.3811367001920855 | 0.5016163322785095 | 0.6017690872079514 |
|                    |                    |                    | 0.4983514455382062 | 0.6188643801890129 | 0.6020404801914013 |
|                    |                    |                    | 0.3265095205663584 | 0.3726077544356757 | 0.4585711635334041 |
|                    |                    |                    | 0.3831734537810620 | 0.3884443543374452 | 0.4239528711694500 |
|                    |                    |                    | 0.3015446553885246 | 0.4397695546303262 | 0.5194782393192646 |
|                    |                    |                    | 0.6693034860452935 | 0.6790242969444683 | 0.5376385196660667 |
|                    |                    |                    | 0.6791483473498247 | 0.6696646401744690 | 0.4920882594780194 |
|                    |                    |                    | 0.6536801606122864 | 0.5783103950706397 | 0.4359141972310073 |
|                    |                    |                    | 0.5049224431185177 | 0.4972358032446533 | 0.3959608889938176 |
|                    |                    |                    | 0.6092822927429309 | 0.6939850094369182 | 0.5518322396262964 |
|                    |                    |                    | 0.3761089846373041 | 0.5518434165172814 | 0.5689822190765064 |
|                    |                    |                    | 0.4484649721166858 | 0.6242062085104417 | 0.5691434131726447 |
|                    |                    |                    | 0.3116990682461949 | 0.4303998236289220 | 0.4723981712642533 |
|                    |                    |                    | 0.4230428320764298 | 0.4618425185624820 | 0.4044957141008354 |
|                    |                    |                    | 0.3370709926758749 | 0.5212013307430622 | 0.5283916460346235 |
|                    |                    |                    | 0.6288581018700555 | 0.6750136496038818 | 0.4592661126726229 |
|                    |                    |                    | 0.6134265916776617 | 0.6187265088085748 | 0.4244752892760329 |
|                    |                    |                    | 0.5402172919301214 | 0.5790289171854117 | 0.4047709798621801 |
|                    |                    |                    | 0.5610355468393998 | 0.6993333292573337 | 0.5200792198169071 |
|                    |                    |                    | 0.4795142602317191 | 0.6636888198787394 | 0.5287219241281182 |
|                    |                    |                    | 0.3527704103271939 | 0.5060670656868000 | 0.4520920500601046 |
|                    |                    |                    | 0.4077453944164459 | 0.5215981322365175 | 0.4188945952033296 |

(2)  $\text{Sr}_2(\text{C}_{60})_3\text{-HL-}P\bar{3}m1$

PBE-D3(BJ)/PAW, 0  $\mu_B$

Lattice constants

20.1000003814999992 0.0000000000000000 0.0000000000000000

-10.0500001907000005 17.4071109463999996 0.0000000000000000

0.0000000000000000 0.0000000000000000 30.0000000000000000

Sr C

2 180

Direct

0.6666083225010079 0.3333542186185519 0.4921212400437679

0.3333052044618148 0.6665764688485567 0.5371378619859105

0.5053969887784298 0.3522657172058818 0.5765018061762012

0.5618289505035848 0.3686816010106904 0.5419328525544077

0.5205542783109084 0.4068641197222790 0.6098822466424346

0.4299545261506209 0.3113714878003187 0.5559242140292451

0.6320323968502393 0.4388921794001363 0.5420899261307746

0.5213432362658404 0.3373505337029196 0.5001934145298401

0.5931077129802763 0.4794399610420173 0.6100452180719913

0.4606271484836225 0.4219957621337624 0.6241678218226224

0.4398259733075447 0.3017085878292182 0.5088421231232375

0.3719956485765960 0.3260002425368614 0.5696571870413087

0.6480647843491169 0.4949558226462050 0.5768324043207054

|                    |                    |                    |                    |                    |                    |
|--------------------|--------------------|--------------------|--------------------|--------------------|--------------------|
| 0.3688202341599834 | 0.5621467878779001 | 0.4868223604624377 | 0.9902279750466493 | 0.3209833065432444 | 0.4912371343235197 |
| 0.5709180882789612 | 0.6896769766056935 | 0.4729966000746711 | 0.9244273982608792 | 0.3472129999282153 | 0.4353608704492887 |
| 0.4802980211554382 | 0.5941641248228527 | 0.4190658616564226 | 0.9922501773219402 | 0.4964001079884851 | 0.3959843671011892 |
| 0.4390209098819758 | 0.6323739869898953 | 0.4869845611440741 | 0.0844330955795618 | 0.3900818830841660 | 0.5510932782432241 |
| 0.4954608841635641 | 0.6487944386148387 | 0.4524203958985325 | 0.1756974192889620 | 0.6230963275676547 | 0.5691845083565074 |
| 0.8468667770795585 | 0.4940222935042816 | 0.5768757044354360 | 0.1756166793670073 | 0.5506919178885159 | 0.5689815738156632 |
| 0.8067964936363933 | 0.4379991750831491 | 0.5421249306783636 | 0.1187984184105424 | 0.6887401936708352 | 0.4730696818217100 |
| 0.8862618898484419 | 0.4784237492408017 | 0.6100762281307590 | 0.0388120643723845 | 0.5781937986215588 | 0.4048105218821758 |
| 0.8814971957981375 | 0.5697135861671497 | 0.5565980098269752 | 0.1841560036368512 | 0.6626191086716875 | 0.5287734708716643 |
| 0.8067203444040799 | 0.3677524230162803 | 0.5419269234291265 | 0.0458945226564123 | 0.3716037376196371 | 0.4585328568152772 |
| 0.8160137175618113 | 0.4789839162505213 | 0.5005657164065362 | 0.0050903118282348 | 0.3875081717648094 | 0.4239306737293919 |
| 0.8861844650530798 | 0.4058174574519589 | 0.6098807702803908 | 0.0386738025992367 | 0.4609271395998182 | 0.4044970496790573 |
| 0.9613490730800279 | 0.5381407387342200 | 0.6244650102159109 | 0.1380585702662194 | 0.4386631650950993 | 0.5194503547722568 |
| 0.8619622385543327 | 0.5603973135481745 | 0.5095194930335173 | 0.1840209665375118 | 0.5200905471806079 | 0.5283860487073880 |
| 0.9541269422493192 | 0.6274633693957207 | 0.5704322718796627 | 0.1533168525968103 | 0.6478143849513162 | 0.4524740859465444 |
| 0.8466978384162699 | 0.3512538693761266 | 0.5764899407995202 | 0.1138386391027324 | 0.5932377474615496 | 0.4190979198787791 |
| 0.8158280636106301 | 0.3364299903352975 | 0.5001740299630227 | 0.1933184086698421 | 0.6313232737875962 | 0.4870180497734342 |
| 0.8244124101631120 | 0.4483851213349971 | 0.4599716455469841 | 0.1185207837570532 | 0.4293336754337412 | 0.4723716818432174 |
| 0.9612234747598845 | 0.4208903644658251 | 0.6241637107668663 | 0.1137551458304181 | 0.5206290990382508 | 0.4189019143796845 |
| 0.0077884509267809 | 0.5026899788271784 | 0.6329809091146216 | 0.1932196535339127 | 0.5610601995390599 | 0.4868327895169154 |
| 0.9949297522593575 | 0.6115536183270232 | 0.6050269779151559 | 0.1531685874642389 | 0.5050285876535445 | 0.4520858377835800 |
| 0.9155894427125536 | 0.6089846383644341 | 0.4778783255100729 | 0.6475253286865310 | 0.1536111785957861 | 0.5768757465208454 |
| 0.0097890634204509 | 0.6781131246470401 | 0.5377332855336823 | 0.6311674522923444 | 0.193435363884749  | 0.5421547133415234 |
| 0.8812139572969991 | 0.3103426603518090 | 0.5558894921641552 | 0.5928093532330971 | 0.1142450443412244 | 0.6102096689383179 |
| 0.8616874298792768 | 0.3007534524372174 | 0.5088034968563722 | 0.6885709681424197 | 0.1190411307864727 | 0.5565048096411698 |
| 0.8243180177380371 | 0.3759722774845809 | 0.4597689151363741 | 0.5608856450154877 | 0.1933103440146471 | 0.5421324233764293 |
| 0.8796813845147562 | 0.4986245892688047 | 0.4272010021227605 | 0.6626607831455930 | 0.1841152983957735 | 0.5005181918870919 |
| 0.9946841291311012 | 0.3811883859540172 | 0.6044131574893602 | 0.5201698766113229 | 0.1141121077566308 | 0.6101913691352224 |
| 0.0859166280866354 | 0.5417688251497218 | 0.6219508437828150 | 0.5777317020140276 | 0.0392860739380166 | 0.6246630519531785 |
| 0.0755983800587784 | 0.6518706388379137 | 0.5935959440308120 | 0.6983560250704499 | 0.1383460627469459 | 0.5093927542562449 |
| 0.9905942424761839 | 0.6688064614265011 | 0.4921818431228848 | 0.6739856176260060 | 0.0465372374437479 | 0.5703987621518074 |
| 0.9246700724424395 | 0.5774955836829105 | 0.4359936609040865 | 0.5047060989587431 | 0.1533627194121031 | 0.5768333305045480 |
| 0.0847508555893889 | 0.6930042175007358 | 0.5519161954362423 | 0.5201020356024199 | 0.1839141447270743 | 0.5004805514415237 |
| 0.9537886851268310 | 0.3249109033857656 | 0.5696196389397897 | 0.6233156259578876 | 0.1754518049380240 | 0.4600200002118123 |
| 0.9152676657754381 | 0.3060920265055989 | 0.4770462144188258 | 0.4604418800543868 | 0.0390772949710641 | 0.6246345186180724 |
| 0.8795519968729619 | 0.3813247941473122 | 0.4268751340281259 | 0.4959058727349023 | 0.9927092841734659 | 0.6333847041097562 |
| 0.9141213854385604 | 0.4573276730780558 | 0.4070175006706651 | 0.6175618357772947 | 0.0057752331359486 | 0.6051406995160676 |
| 0.0753500281492402 | 0.4215852060020171 | 0.5929710075501831 | 0.6932124239742193 | 0.0846535607193184 | 0.4777764334258557 |
| 0.1204709879573236 | 0.6177551870548719 | 0.6020866896577478 | 0.6688277928307526 | 0.9907868498115175 | 0.5377213554197688 |
| 0.1203408326982861 | 0.5004646960052441 | 0.6017562098897451 | 0.4291059588655663 | 0.1186154297017627 | 0.5564313932551985 |
| 0.0462132020238261 | 0.6741447971834201 | 0.4593493009821384 | 0.4386322589186483 | 0.1379686602175818 | 0.5093239726791752 |
| 0.0053368136731247 | 0.6178899755884458 | 0.4245495687077006 | 0.5508928346670647 | 0.1753488068349925 | 0.4600041056253518 |
| 0.1383226082228685 | 0.6983288286147367 | 0.5201517929912963 | 0.6181528035049745 | 0.1200925299999731 | 0.4272835609689327 |
| 0.0094131285281185 | 0.3302632681812375 | 0.5367880400445955 | 0.3871153967762523 | 0.0053863953890501 | 0.6050752068142978 |

|                    |                    |                    |
|--------------------|--------------------|--------------------|
| 0.4569122201741877 | 0.9145218794339482 | 0.6224796558030923 |
| 0.5772609758874588 | 0.9250470650601933 | 0.5938346967199343 |
| 0.6783132534412111 | 0.0097730142793392 | 0.4921441722284574 |
| 0.6522673303717280 | 0.0752871131126765 | 0.4359984448153463 |
| 0.6089654632842959 | 0.9158150811277658 | 0.5520747958434716 |
| 0.3713318800556660 | 0.0460296216686781 | 0.5703125057719438 |
| 0.3902225833755810 | 0.0841849106083321 | 0.4776993597132198 |
| 0.5008268973899912 | 0.1199295834217626 | 0.4272451057156033 |
| 0.5422514598657044 | 0.0854298183691787 | 0.4072927508715464 |
| 0.3469003049451974 | 0.9246731675559621 | 0.5937696660259582 |
| 0.4983350922829064 | 0.8800379178202763 | 0.6025228548335292 |
| 0.3810078327338457 | 0.8798531107963303 | 0.6024849073345289 |
| 0.6278444972360214 | 0.9539585663243575 | 0.4594512668702581 |
| 0.6120643843004601 | 0.9945814749978479 | 0.4246802646051606 |
| 0.5605501459600890 | 0.8620487544515385 | 0.5204447868290074 |
| 0.3208834431213087 | 0.9902125028332938 | 0.5376230635112862 |
| 0.3303756312357014 | 0.0092165120649416 | 0.4920504587844660 |
| 0.4219159718125695 | 0.0749445222111455 | 0.4359358606592490 |
| 0.5032747160075687 | 0.0072579173036409 | 0.3963667292228515 |
| 0.3059724666335745 | 0.9153187280985802 | 0.5519885533534995 |
| 0.4482617794518694 | 0.8246100258749551 | 0.5697578857904175 |
| 0.3758328821013645 | 0.8244916248087851 | 0.5697374932928227 |
| 0.5700782170775749 | 0.8813849131836163 | 0.4733356358068594 |
| 0.5387364702114193 | 0.9608861371309484 | 0.4051178857798658 |
| 0.4790719123420996 | 0.8161143971409678 | 0.5292721261009197 |
| 0.3252113816647421 | 0.9534700617180639 | 0.4593635378291029 |
| 0.3816251457611126 | 0.9942263579645850 | 0.4246169870137744 |
| 0.4214441216045522 | 0.9607018965921479 | 0.4050884309908508 |
| 0.3008068275712804 | 0.8616250472435057 | 0.5203730240120977 |
| 0.3364922014021227 | 0.8158311696765029 | 0.5292352172435590 |
| 0.4944823078274841 | 0.8466357553347721 | 0.4529226660780193 |
| 0.4790005320668123 | 0.8858672590396672 | 0.4195690681473722 |
| 0.4382917299215111 | 0.8066900265485401 | 0.4876099002698940 |
| 0.3106037147911103 | 0.8809654470162381 | 0.4732633585513931 |
| 0.4063691081321149 | 0.8857557512987750 | 0.4195567883493742 |
| 0.3679939390782667 | 0.8065523488513221 | 0.4875919837970196 |
| 0.3516537943485576 | 0.8464055300254973 | 0.4528857911454712 |

(3)  $\text{Ba}_2(\text{C}_{60})_3\text{-HL-}P\bar{3}m1$

PBE-D3(BJ)/PAW, 0  $\mu\text{B}$

Lattice constants

|                      |                     |                     |
|----------------------|---------------------|---------------------|
| 20.1000003814999992  | 0.0000000000000000  | 0.0000000000000000  |
| -10.0500001907000005 | 17.4071109463999996 | 0.0000000000000000  |
| 0.0000000000000000   | 0.0000000000000000  | 30.0000000000000000 |

Ba C

2 180

Direct

|                    |                    |                    |
|--------------------|--------------------|--------------------|
| 0.6666705589900715 | 0.3332440068633530 | 0.4599921351481079 |
| 0.3333676783043308 | 0.6666081175651682 | 0.5691237992768662 |
| 0.5120603832199021 | 0.3431586334602779 | 0.5605367093975704 |
| 0.5634034775515122 | 0.3649075689015318 | 0.5226529590613118 |
| 0.5321569191315453 | 0.3924625318036365 | 0.5973529513324226 |
| 0.4339636085494579 | 0.3050345965753074 | 0.5435224461207595 |
| 0.6337046158562345 | 0.4351185592246771 | 0.5229704869725282 |
| 0.5172008726942270 | 0.3396969972431622 | 0.4823364032923443 |
| 0.6047986523801594 | 0.4650082245211808 | 0.5976873706728479 |
| 0.4747659373019110 | 0.4048996425681373 | 0.6186659855923209 |
| 0.4371107403085794 | 0.3024390330107133 | 0.4951977122017032 |
| 0.3784029343287289 | 0.3170926924639640 | 0.5640544678477969 |
| 0.6548075077708136 | 0.4857205262142375 | 0.5611756691420626 |
| 0.6597733723724235 | 0.4821236979579185 | 0.4829702643673147 |
| 0.5426377814121386 | 0.3850894814400942 | 0.4433679818120249 |
| 0.5920925948283331 | 0.5220662054588324 | 0.6192120603958932 |
| 0.5116412359055005 | 0.4850919843590710 | 0.6319759173259253 |
| 0.3990019239671059 | 0.3679147833451740 | 0.6023858275588525 |
| 0.3848304446830382 | 0.3121930778130976 | 0.4690687876562707 |
| 0.3239124146000736 | 0.3268999411318509 | 0.5370615332152476 |
| 0.6934109960957736 | 0.5641486370290675 | 0.5446815767702023 |
| 0.6969606921109124 | 0.5619499749286141 | 0.4963559809894568 |
| 0.6151478084392081 | 0.4575202358475668 | 0.4436957519773196 |
| 0.4885768027558418 | 0.3949728412648780 | 0.4163097500834169 |
| 0.6295540832061063 | 0.5981582742655880 | 0.6034402797658083 |
| 0.4716702931293175 | 0.5253004219690048 | 0.6287534814494488 |
| 0.3577397218645358 | 0.4094599694285848 | 0.5989764293869304 |
| 0.3272385472843427 | 0.3244968581344890 | 0.4903088040783778 |
| 0.4110021677012529 | 0.3593585385763532 | 0.4289257754001676 |
| 0.3113680876954911 | 0.3841757672635995 | 0.5585100138644384 |
| 0.6811203150735839 | 0.6194003620281325 | 0.5654254117427756 |
| 0.6878869721434248 | 0.6148408174558542 | 0.4704122286785608 |
| 0.6059750158570690 | 0.5122112201786094 | 0.4168266020638354 |
| 0.5275648987403897 | 0.4737019603518196 | 0.4001921487459236 |
| 0.5882397120313063 | 0.6396391140051652 | 0.6000117299334043 |
| 0.3932669798810802 | 0.4867807512238027 | 0.6121016937879593 |
| 0.5106599180949131 | 0.6040274378156405 | 0.6126394269132560 |
| 0.3181075850098570 | 0.3796057601829733 | 0.4635147729862232 |
| 0.3696804403061658 | 0.4008397621677697 | 0.4255058679092334 |
| 0.3022759346244153 | 0.4370679223285659 | 0.5325726673970224 |
| 0.6719859458239141 | 0.6744933423988841 | 0.5386189908288164 |
| 0.6753182325361803 | 0.6721012982796288 | 0.4918620430119960 |

|                    |                    |                    |                    |                    |                    |
|--------------------|--------------------|--------------------|--------------------|--------------------|--------------------|
| 0.6415036229492500 | 0.5895334253046515 | 0.4299530183175043 | 0.0520853015520659 | 0.6425878262241753 | 0.5988021381084681 |
| 0.4875812693185730 | 0.5138941240023199 | 0.3969558745535520 | 0.9974106931145795 | 0.6727025265663504 | 0.4901166476862345 |
| 0.6143862719316528 | 0.6867603375280016 | 0.5598593650318284 | 0.9483754539535744 | 0.5887264532052535 | 0.4288389552278659 |
| 0.3840866428030299 | 0.5414588587110342 | 0.5852249606898524 | 0.0731081106257078 | 0.6888325283186716 | 0.5582863139875771 |
| 0.4566052974651899 | 0.6138779627296760 | 0.5855533116600297 | 0.9385044710484707 | 0.3190625247185996 | 0.5656406088507120 |
| 0.3058134249027688 | 0.4348700096584622 | 0.4842483038395349 | 0.9269888055926512 | 0.3119731288417071 | 0.4706344430914722 |
| 0.4071354839794021 | 0.4769290138961452 | 0.4097281004904190 | 0.9062018918579109 | 0.3937170258963635 | 0.4169588478346928 |
| 0.3394500219734335 | 0.5168989279308092 | 0.5459560818359631 | 0.9460749432615690 | 0.4720681259816069 | 0.4002264232204519 |
| 0.6208420705237468 | 0.6819107259926790 | 0.4648639248346370 | 0.0517035412340669 | 0.4120768532032319 | 0.6001039627004645 |
| 0.6002418561778613 | 0.6310770295738856 | 0.4265376475287347 | 0.0938836060898347 | 0.6070933551719332 | 0.6119627769985376 |
| 0.5244806972083462 | 0.5940918764985894 | 0.4102600215075824 | 0.0937085404749136 | 0.4896901834191433 | 0.6126434360460004 |
| 0.5621130509710696 | 0.6965230003369359 | 0.5337231303866034 | 0.0615974118685382 | 0.6817406304005607 | 0.4632995558847177 |
| 0.4820441715590245 | 0.6592820363561909 | 0.5465887470304274 | 0.0311772458584350 | 0.6300293281801009 | 0.4253566213927309 |
| 0.3444215398122866 | 0.5133020863908277 | 0.467756540533030  | 0.1350226001286663 | 0.6978084036418754 | 0.5323269223094125 |
| 0.3944331865863091 | 0.5339978019139630 | 0.4312370354838752 | 0.0026817658679116 | 0.3281048933859214 | 0.5388144775914673 |
| 0.3655264398012270 | 0.5638955860751657 | 0.5059611554426464 | 0.9968520404029017 | 0.3246023752452059 | 0.4920615622647590 |
| 0.5652648505366983 | 0.6939421285073134 | 0.4854008604748630 | 0.9480035832975575 | 0.3582252641222495 | 0.4301210281234785 |
| 0.4670846416303049 | 0.6065411126759153 | 0.4315604431012590 | 0.0262507952683907 | 0.5120257806169805 | 0.3969341873042619 |
| 0.4358306953666363 | 0.6340860183945858 | 0.5062732124112619 | 0.0725986910718865 | 0.3857687588029113 | 0.5599823215688349 |
| 0.4871712701949730 | 0.6558325681725166 | 0.4683889140769700 | 0.1576712771695283 | 0.6161548748757857 | 0.5850646073050854 |
| 0.8313528594502315 | 0.4881435684804655 | 0.5605747120474435 | 0.1575685633227112 | 0.5436377276864103 | 0.5854851409763352 |
| 0.8016601755355049 | 0.4366594172338615 | 0.5227532394307438 | 0.1291961975510208 | 0.6941057485763681 | 0.4840081163237993 |
| 0.8606362502352176 | 0.4681744174809175 | 0.5974101299466917 | 0.0697687386801444 | 0.5925183281602413 | 0.4096164934468502 |
| 0.8713114486003807 | 0.5661890371998460 | 0.5434654435164261 | 0.1776676031706013 | 0.6606418414652115 | 0.5457435957897991 |
| 0.8015743412239302 | 0.3663634536586230 | 0.5231479278494542 | 0.0610965878075583 | 0.3789729767899146 | 0.4649901110891349 |
| 0.8226076943288234 | 0.4827325007642055 | 0.4823838631585551 | 0.0308026524617330 | 0.3994558496956579 | 0.4266443409298474 |
| 0.8605138580838703 | 0.3955168176979919 | 0.5978279423507730 | 0.0695618376110305 | 0.4751555628070137 | 0.4102688003480771 |
| 0.9305261263178767 | 0.5256433571444288 | 0.6186411088433523 | 0.1345800903352266 | 0.4379344984385009 | 0.5337763489387639 |
| 0.8654732720180132 | 0.5628688312319629 | 0.4951468203759317 | 0.1774332835857113 | 0.5180514347644399 | 0.5465426415921792 |
| 0.9389909474046835 | 0.6218159173097321 | 0.5639215691968787 | 0.1689889127701331 | 0.6554297779889638 | 0.4675555529974029 |
| 0.8311222544152446 | 0.3453680636494410 | 0.5613765107861345 | 0.1395872302828747 | 0.6052870434792571 | 0.4310962070336050 |
| 0.8224417926866070 | 0.3401695441234760 | 0.4831781693056197 | 0.1985296695177101 | 0.6344374839661923 | 0.5057819425102665 |
| 0.8424789452473901 | 0.4571580581963762 | 0.4434413552386826 | 0.1287535256636998 | 0.4346122310207344 | 0.4854584321002355 |
| 0.9303239184306367 | 0.4082925790153408 | 0.6193295639698998 | 0.1394513795464841 | 0.5326198782146533 | 0.4315040738042425 |
| 0.9738425827836747 | 0.4887962727906458 | 0.6319964053676864 | 0.1983872830164099 | 0.5641226791068757 | 0.5061751191248831 |
| 0.9692860885254695 | 0.6013413218209209 | 0.6022652947724548 | 0.1687186205198705 | 0.5126497326351956 | 0.4683533795893320 |
| 0.9274682285457685 | 0.6150494023436283 | 0.4689525305605576 | 0.6546184608798032 | 0.1692861466715195 | 0.5621375893492180 |
| 0.0032439505530637 | 0.6762106166337130 | 0.5368620686002449 | 0.6337570882275637 | 0.1987443301088281 | 0.5238023517805729 |
| 0.8709136082448626 | 0.3066975062332624 | 0.5449203873574214 | 0.6041786695119000 | 0.1396651871706118 | 0.5984447654867785 |
| 0.8650866146917191 | 0.3030058812821086 | 0.4965980646052305 | 0.6936767736763305 | 0.1297677317785000 | 0.5458659197285565 |
| 0.8423930516664352 | 0.3846493661229204 | 0.4438480645050858 | 0.5633188214046719 | 0.1983520060046533 | 0.5231740778909795 |
| 0.9063787891015832 | 0.5111213871456152 | 0.4163087334717287 | 0.6604287501722624 | 0.1780891508884120 | 0.4839543363873569 |
| 0.9689092711973345 | 0.3707676233056475 | 0.6035912496683867 | 0.5313719331020337 | 0.1392422688626469 | 0.5977922404234894 |
| 0.0540192887221236 | 0.5287537933570613 | 0.6287154504768053 | 0.5914951944082032 | 0.0699034052181627 | 0.6199707791138476 |

|                    |                    |                    |                    |                    |                    |
|--------------------|--------------------|--------------------|--------------------|--------------------|--------------------|
| 0.6977362207810525 | 0.1356652047224120 | 0.4975491195669616 | 0.3402983568408252 | 0.8221969238623972 | 0.5458332031893725 |
| 0.6814123770568419 | 0.0622180288223360 | 0.5666096438275389 | 0.4891876654560388 | 0.8318652730113421 | 0.4689287015906919 |
| 0.5115356846243648 | 0.1684365643426592 | 0.5608572901506172 | 0.4693531986587681 | 0.8610620623256718 | 0.4319897194896988 |
| 0.5175575657983521 | 0.1773247240879611 | 0.4826800128582748 | 0.4374351955831942 | 0.8019923023900056 | 0.5066121694688382 |
| 0.6162599329113182 | 0.1580448460744573 | 0.4445031447624740 | 0.3070628950737600 | 0.8705388974001265 | 0.4839403799433780 |
| 0.4739141896170163 | 0.0692232832073459 | 0.6189106322733114 | 0.3965431174279902 | 0.8606337010842757 | 0.4313312817907506 |
| 0.5109124586062354 | 0.0261269133666312 | 0.6324295555114314 | 0.3669912286248298 | 0.8015844275895359 | 0.5059769910968277 |
| 0.6294009117715639 | 0.0315889102024858 | 0.6044160107553265 | 0.3461294229676131 | 0.8310411399358076 | 0.4676535852490372 |
| 0.6892212927001971 | 0.0738936132259002 | 0.4716281708750517 |                    |                    |                    |
| 0.6728451574350405 | 0.9981833018652908 | 0.5398321030319916 |                    |                    |                    |
| 0.4336337837632612 | 0.1282647535462873 | 0.5435433801916993 |                    |                    |                    |
| 0.4373321546987959 | 0.1342075934790497 | 0.4952274887836330 |                    |                    |                    |
| 0.5435996192659713 | 0.1576561416012213 | 0.4438514575631465 |                    |                    |                    |
| 0.6076783953400690 | 0.0944022047759293 | 0.4176489484516979 |                    |                    |                    |
| 0.3983466372901912 | 0.0302469074314516 | 0.6023424337017254 |                    |                    |                    |
| 0.4712445113308473 | 0.9459601445452818 | 0.6291089724870546 |                    |                    |                    |
| 0.5883850402677960 | 0.9487940474626181 | 0.6008869689965199 |                    |                    |                    |
| 0.6766981861852909 | 0.0040902266392279 | 0.4930838861169499 |                    |                    |                    |
| 0.6433148967225892 | 0.0528156747622831 | 0.4309808697547379 |                    |                    |                    |
| 0.6151858282129030 | 0.9281202462313684 | 0.5608842325073115 |                    |                    |                    |
| 0.3780082594740841 | 0.0604566306858535 | 0.5638962990317276 |                    |                    |                    |
| 0.3855223288961095 | 0.0721778284661008 | 0.4689205484844817 |                    |                    |                    |
| 0.4900375318837094 | 0.0937424025059126 | 0.4165998538359302 |                    |                    |                    |
| 0.5294827122689029 | 0.0543285773678569 | 0.4006968969725329 |                    |                    |                    |
| 0.3574014608442681 | 0.9474618470924907 | 0.5988281342775705 |                    |                    |                    |
| 0.5106799484505151 | 0.9065368113936085 | 0.6132047164307312 |                    |                    |                    |
| 0.3930445448773542 | 0.9058809488938667 | 0.6121480086780967 |                    |                    |                    |
| 0.6227093820938813 | 0.9398080040329974 | 0.4659047246145371 |                    |                    |                    |
| 0.6023831014401347 | 0.9700288865659198 | 0.4274493134031023 |                    |                    |                    |
| 0.5633875504864605 | 0.8660802429727311 | 0.5345755542238000 |                    |                    |                    |
| 0.3240036898062456 | 0.9961691603603279 | 0.5367233084510623 |                    |                    |                    |
| 0.3278746513933148 | 0.0021078543692934 | 0.4899759996227530 |                    |                    |                    |
| 0.4123314406802693 | 0.0515004598688283 | 0.4289142512925420 |                    |                    |                    |
| 0.4898130806812538 | 0.9741662314995198 | 0.3973564231900106 |                    |                    |                    |
| 0.3114759937669482 | 0.9263667981431668 | 0.5581783543023674 |                    |                    |                    |
| 0.4571149425986357 | 0.8426309604790641 | 0.5859391571745500 |                    |                    |                    |
| 0.3844569912139251 | 0.8422299295641789 | 0.5852882754887836 |                    |                    |                    |
| 0.5670754514282155 | 0.8720198535249062 | 0.4862563161504657 |                    |                    |                    |
| 0.5268125964388379 | 0.9310703665040743 | 0.4108663761948463 |                    |                    |                    |
| 0.4831570412766337 | 0.8229598568438538 | 0.5471160667406068 |                    |                    |                    |
| 0.3193335158037353 | 0.9380808012447326 | 0.4632012177548328 |                    |                    |                    |
| 0.3713285600911501 | 0.9687120597051362 | 0.4253892486720123 |                    |                    |                    |
| 0.4092293657645685 | 0.9303987938987537 | 0.4098172347215739 |                    |                    |                    |
| 0.3029782480998906 | 0.8646080097900430 | 0.5322533083444739 |                    |                    |                    |
